# **Atrophic astrocytes in aged marmosets present tau hyperphosphorylation, RNA oxidation, and DNA fragmentation.**

Juan D. Rodríguez-Callejas<sup>1</sup>, Eberhard Fuchs<sup>2</sup>, Claudia Perez-Cruz<sup>1\*</sup>

<sup>1</sup> Centro de Investigación y de Estudios Avanzados del Instituto Politécnico Nacional. Department of Pharmacology; <sup>2</sup> German Primate Center, Leibniz-Institute of Primate Research, Göttingen, Germany.

\*E-mail: [cperezc@cinvestav.mx](mailto:cperezc@cinvestav.mx)

## 1 **Abstract (166)**

2 Astrocytes perform multiple essential functions in the brain showing morphological  
3 changes. Hypertrophic astrocytes are commonly observed in cognitively healthy aged  
4 animals, implying a functional defense mechanism without losing neuronal support. In  
5 neurodegenerative diseases, astrocytes show morphological alterations, such as decreased  
6 process length and reduced number of branch points, known as *astroglial atrophy*, with  
7 detrimental effects on neuronal cells. The common marmoset (*Callithrix jacchus*) is a  
8 non-human primate that, with age, develops several features that resemble  
9 neurodegeneration. In this study, we characterize the morphological alterations in  
10 astrocytes of adolescent (mean 1.75 y), adult (mean 5.33 y), old (mean 11.25 y), and aged  
11 (mean 16.83 y) male marmosets. We observed a significantly reduced arborization in  
12 astrocytes of aged marmosets compared to younger animals in the hippocampus and  
13 entorhinal cortex. These astrocytes also show oxidative damage to RNA and increased  
14 nuclear pTau (AT100). Astrocytes lacking S100A10 protein show a more severe atrophy  
15 and DNA fragmentation. Our results demonstrate the presence of atrophic astrocytes in  
16 the brains of aged marmosets.

17

18

19

20

21

## 22 **Keywords**

23 GFAP, 8-hydroxyguanosine, AT-100, non-human primate, entorhinal cortex, aging.

24

## 25 **ACKNOWLEDGMENTS**

26 Rodriguez-Callejas, J.D. CONACYT Scholarship no. 308515

27

## 1. Introduction

28

29

30 The common marmoset (*Callithrix jacchus*) is a small New-World primate with high  
31 genetic homology to humans and a shorter life span than Old-World primates (Abbott and  
32 Barnett, 2003). Marmosets are widely used in biomedical research due to their small size  
33 (20-30 cm and 250-600 g) and high reproductive capacity (Okano et al., 2012). For aging  
34 research, marmosets are positioned as ideal non-human primate (NHP) model as they  
35 show signs of aging around 8 years of age, while their life span in captivity reaches up to  
36 20 years (Kramer and Burns, 2019). Several groups have documented cognitive  
37 impairment in aged marmosets: working memory impairment is observed in old  
38 marmosets compared to younger subjects (De Castro and Girard, 2021; Rothwell et al.,  
39 2022; Workman et al., 2018), and delay response strategy is detectable in adult marmosets  
40 (Sadoun et al., 2019, 2015). Also, old marmosets develop amyloid plaques in the cortex  
41 and tau hyperphosphorylation (pTau) in cortical and hippocampal regions. Notably, pTau  
42 can be detected in adolescent marmosets, significantly increasing with aging (Rodríguez-  
43 Callejas et al., 2016). Dystrophic microglia, iron accumulation, and increased oxidative  
44 stress are features of old and aged marmosets (Rodríguez-Callejas et al., 2019). Thus, the  
45 common marmoset has been positioned as an ideal model for understand the etiological  
46 factors associated with aging and neurodegeneration (t'Hart et al., 2012; Rodríguez-  
47 Callejas et al., 2016; Ross and Salmon, 2018; Rodríguez-Callejas et al., 2019; Sadoun et  
48 al., 2019).

49 Astrocytes are star-shaped glial cells with radial processes that play essential functions as  
50 blood-brain barrier (BBB) formation and maintenance (Abbott et al., 2006; Daneman and  
51 Prat, 2015; Janzer and Raff, 1987), ionic environment regulation (Anderson and  
52 Swanson, 2000; Sattler and Rothstein, 2006; Seifert et al., 2006; Simard and Nedergaard,  
53 2004; Strohschein et al., 2011), control of neurogenesis and glycogen storage (Brown et  
54 al., 2005; Brown and Ransom, 2007; Matsui et al., 2017), neurometabolic uncoupling

55 (Magistretti, 2006), iron-induce antioxidant protection (Hoepken et al., 2004; Oide et al.,  
56 2006; Regan et al., 2002), among others. When the brain tissue is damaged, astrocytes  
57 exhibit hypertrophy (Hol and Pekny, 2015; Kimelberg, 2004), and alter gene expression  
58 of glial fibrillary acidic protein (GFAP) resulting in a *reactive state* (Sofroniew, 2009).  
59 Previous reports indicates that astrocytes of aged rats showed an enhanced expression of  
60 GFAP and hypertrophic phenotype, similar to data from old humans, and senescence-  
61 accelerated animal models (Clarke et al., 2018; Cotrina and Nedergaard, 2002; Hol and  
62 Pekny, 2015; Kohama et al., 1995; Nichols et al., 1993; Rodríguez et al., 2014; Rozovsky  
63 et al., 1998; Woodruff-Pak, 2008; Wu et al., 2005; Yoshida et al., 1996). In aged mice,  
64 this reactive phenotype is characterized by an increase processes surface, volume, and  
65 somata. In contrast, in the entorhinal cortex (ENT) of aged mice, astrocytes present  
66 smaller processes, a condition named *atrophic astrocytes* (Rodríguez et al., 2014). In  
67 cognitive-healthy aged humans and NHPs, atrophic astrocytes can be detected  
68 in *substantia nigra pars compacta* and the midbrain, respectively (Jyothi et al., 2015;  
69 Kanaan et al., 2010). However, in mouse models of AD, astroglial atrophy is heavily  
70 observed not only in ENT, but also in DG, CA1, and medial prefrontal cortex (Beauquis  
71 et al., 2013; Kulijewicz-Nawrot et al., 2012; Olabarria et al., 2010; Verkhratsky et al.,  
72 2015). Therefore, atrophic astrocytes in vulnerable brain regions may be related to a  
73 neurodegenerative process. Marmosets develop several features associated with  
74 neurodegeneration during aging (i.e., amyloid plaques, pTau, dystrophic microglia,  
75 oxidative damage) (Geula et al., 2002; Maclean et al., 2000; Palazzi et al., 2006;  
76 Philippens et al., 2016; Ridley et al., 2006; Rodriguez-Callejas et al., 2016; Rodríguez-  
77 Callejas et al., 2019; Sharma et al., 2019), but up to day there is no information about the  
78 presence of atrophic astrocytes in this NHP. Therefore, we aimed to determine the  
79 phenotypic alterations in astrocytes of the hippocampus and ENT in the marmoset during  
80 aging.

81 For this, we evaluated morphological alterations in GFAP+ astrocytes by the Sholl  
82 analysis in ENT and hippocampal region (CA1, CA2-CA3) of male adolescence, adult,  
83 old, and aged marmosets. We also determined the number of astrocytes with oxidative  
84 damage to RNA, pTau, and S100A10 protein (S100A10+) by double-immunolabeling.  
85 We found an enhanced number of reactive astrocytes (defined by an increased process  
86 length, volume, and branch points) in adult and old marmosets compared to adolescents,  
87 featuring a reactive phenotype. However, in aged marmosets, these features were  
88 significantly decreased in all regions analyzed, showing an atrophic phenotype. In  
89 addition, old and aged marmosets showed an enhanced number of astrocytes with RNA  
90 oxidation and nuclear pTau. Furthermore, in old subjects, astrocytes with shorter  
91 processes length and branching points were S100A10-, a marker of neuroprotective  
92 astroglial phenotype. S100A10-astrocytes presented fragmentation of DNA (TUNEL  
93 staining) and were clearly atrophic. Thus, our results show that marmosets develop  
94 astroglia atrophy in the hippocampus and ENT during the aging process. This data offers  
95 further evidence that marmosets develop several features of a neurodegenerative process  
96 with aging.

97

## 98 **2. Methods**

### 99 **2.1 Subjects**

100 Laboratory-bred common marmosets (*Callithrix jacchus*) were housed at the German  
101 Primate Center, Göttingen, Germany, under standard conditions complying with the  
102 European Union guidelines for the accommodation and care of animals used for  
103 experimental and other scientific purposes (2007/526/EC). All animal experiments were  
104 performed in accordance with the German Animal Welfare Act, which strictly adheres to  
105 the European Union guidelines (EU directive 2010/63/EU) on the use of NHP for

106 biomedical research. Experienced veterinarians and caretakers constantly monitored the  
107 animals. Animals did not present neurological disorders or other injuries that can cause  
108 trauma to the central nervous system.

## 109 **2.2 Tissue preparation**

110 Brains of male marmosets of different ages were used in the current study: Four  
111 adolescents (A: mean age  $1.75 \pm 0.18$  years old), three adults (Ad: mean age  $5.33 \pm 0.88$   
112 years old), five old (O: mean age  $11.25 \pm 0.70$  years old), and three aged (Ag: mean age  
113  $16.83 \pm 2.59$  years old) individuals based on previous age classification (Abbott and  
114 Barnett, 2003). Animals were anesthetized with an i.p. injection (0.1 ml/100 g body  
115 weight) of GM II (ketamine, 50 mg/ml; xylazine 10mg/ml; atropin 0.1 mg/ml) and after  
116 loss of consciousness they received an i.p. injection of ketamine (400 mg/kg body  
117 weight). Bodies were transcardially perfused with cold (4 °C) saline (0.9 % NaCl) for 5  
118 min. Subsequently, for fixation of the brains, cold (4 °C) 4 % paraformaldehyde (PFA)  
119 in 0.1 M phosphate buffer, pH 7.2, was infused for 15 min. The brains were removed and  
120 post-fixed in fresh 4 % PFA at 4 °C, where brains were stored until sectioning. Before  
121 sectioning, tissue was washed thoroughly with 0.1 M phosphate-buffered saline (PBS:  
122 0.15 M NaCl, 2.97 mM  $\text{Na}_2\text{HPO}_4 \cdot 7\text{H}_2\text{O}$ , 1.06 mM  $\text{KH}_2\text{PO}_4$ ; pH 7.4), and immersed in  
123 30 % sucrose in PBS at 4°C four days before sectioning. Coronal sections (40  $\mu\text{m}$  thick)  
124 were obtained using a sliding microtome (Leica RM2235) and we prepared series every  
125 6th section (at intervals of 240  $\mu\text{m}$ ) from the hippocampal formation (Bregma +8.00 mm  
126 to +0.80 mm) according to Paxinos et al.(2012). Sections were immediately immersed in  
127 cryoprotectant solutions for immunofluorescence [300 g sucrose; 10 g polyvinyl-  
128 pyrrolidone (PVP-40); 500 mL of 0.1M PBS and 300 mL ethylene glycol, for 1 L] and  
129 stored at -20°C until use.

## 130 **2.3 Double labeling immunofluorescence**

131 For double labeling of astrocytes with AT100 and GFAP, brain sections were pretreated  
132 with formic acid for 15 min and with citrate buffer 20X at 94 °C for 10 min. To reduce  
133 autofluorescence and background due to PFA fixation, sections were incubated with 1%  
134 sodium borohydride (NaBH<sub>4</sub>) in PBS-1X for 10 min. Then, sections were rinsed with 0.5  
135 % PBS-Tween20 twice for 3 min. To block potential nonspecific antibody binding,  
136 sections were incubated for 30 min using a solution containing 2 % donkey serum, 50  
137 mM glycine, 0.05 % Tween20, 0.1 % TritonX-100, and 0.1 % BSA diluted in PBS.  
138 Primary antibody anti-GFAP (1:300, goat/IgG, Abcam, Ab53554) was incubated in an  
139 antibody signal enhancer (ASE) solution (Flores-Maldonado et al., 2020; Rosas-Arellano  
140 et al., 2016), consisting of 10 mM glycine, 0.05 % Tween20, 0.1 % TritonX-100 and 0.1  
141 % hydrogen peroxide in PBS, and left overnight at 4 °C. For double labeling, GFAP  
142 antibody was incubated with 8-hydroxyguanosine (8OHG, marker of RNA oxidation)  
143 (1:10000, mouse/IgG, Abcam, ab62623), AT100 (1:500, mouse/IgG, Thermo Scientific,  
144 MN1060), and S100A10 (1:250, mouse/IgG, Invitrogen, PIMA515326) primary  
145 antibodies. On the next day, sections were washed with 0.5 % PBS-Tween20, and  
146 thereafter, incubated with secondary antibodies ALEXA647 anti-goat (1:500,  
147 donkey/IgG, Jackson ImmunoResearch, 705-605-147) and ALEXA488 anti-mouse  
148 (1:500, donkey/IgG, Jackson ImmunoResearch, 715-545-150), diluted in 0.1 % PBS-  
149 Tween20 for 2 hours at RT. All sections were incubated with DAPI (1:1000, Affymetrix)  
150 in 0.2 % PBS-triton for 30 min. To reduce lipofuscin autofluorescence, brain sections  
151 were incubated in 0.1% Sudan black (Sigma) for 15 min. Finally, sections were washed  
152 and mounted on glass slides with mounting medium VectaShield (Vector Laboratories).

#### 153 **2.4 Double labeling immunofluorescence and TUNEL protocol**

154 To detect DNA fragmentation in GFAP<sup>+</sup> astrocytes an *in situ* cell death detection kit  
155 (Roche, 11684795910) was used. Before TUNEL reaction, brain sections were incubated  
156 with 1% sodium borohydride (NaBH<sub>4</sub>) in PBS-1X for 10 min. Then, sections were

157 permeabilized with 0.3% PBS-triton for 20 min. For TUNEL reaction, sections were  
158 incubated in the mixture of label solution and enzyme solution at 37 °C for 1 h. Sections  
159 were rinsed with PBS-1X for 10 min. Thereafter, double labeling immunofluorescence  
160 for GFAP and S100A10 was performed as described in 2.3.

## 161 **2.5 Image acquisition**

162 Images were obtained by a confocal microscope (Leica TCS-SP8) equipped with Diode  
163 (405 nm), OPSL (488 nm), OPSL (552 nm), and Diode (638 nm) laser. Brain regions  
164 were imaged performing optical scanning with 732 gain, -2.8 offset, and 1.0 UA pinhole  
165 diameter. For double labeling (GFAP versus 8OHG, AT100, or S100A10) and Sholl  
166 analysis images were acquired with a 63X objective. All confocal images were obtained  
167 as z-stacks of single optical sections. Stacks of optical sections were superimposed as a  
168 single 2D image by using the Leica LASX software. We captured images from different  
169 regions of the hippocampus (DG, CA3, and CA2-CA1) and ENT according to the  
170 marmoset brain atlas (Paxinos et al., 2012).

## 171 **2.6 Sholl analysis**

172 To quantify the length, volume, and number of branching points of astrocytic processes,  
173 a Sholl analysis was performed by using NeuronStudio software (Canchi et al., 2017).  
174 For this analysis, we captured 3 images per brain region analyzed (DG, CA3, CA2-CA1,  
175 and ENT), per subject.

176 In every captured image, ten astrocytes were analyzed, given a total of 1440 astrocytes  
177 analyzed. All the images were captured with the following parameters: optical gain 732,  
178 offset – 3.0, and 1.0 AU pinhole diameter. For Sholl analysis, image z-stacks were  
179 imported to NeuronStudio software for the reconstruction of astrocytes processes. Sholl  
180 analysis is based on the generation of concentric spheres radiating from the cell center  
181 and at each sphere, the length, volume, and the number of branch points are quantified.



182 In our experiment, we run a Sholl analysis with every concentric sphere 1  $\mu\text{m}$  larger than  
183 the previous one. To calculate the total length, total volume, and the number of branch  
184 points, we sum the values of the respective parameter (length, volume, or branch points)  
185 obtained in all the concentric spheres (radius) of the astrocyte analyzed.

## 186 **2.7 Sholl analysis of S100A10 positive and negative astrocytes of aged marmosets**

187 Microglia can be classified into two major subtypes (proinflammatory and phagocytic)  
188 (Cameron and Landreth, 2010; Franco and Fernández-Suárez, 2015; Kabba et al., 2017;  
189 Orihuela et al., 2016; Tang and Le, 2016). Previous data in marmosets have shown that  
190 aging is accompanied by an increased number of phagocytic-ameboid dystrophic  
191 microglia (Rodríguez-Callejas et al., 2019). Dysfunctional phagocytic microglia renders  
192 neuronal cells vulnerable to further damage. As we observed major astrocyte atrophy in  
193 aged marmosets, we decided to determine whether those cells are S100A10+, a specific  
194 maker of neuroprotective phenotype (Clarke et al., 2018). We captured three images per  
195 brain region (DG, CA3, CA2-CA1, and ENT) on each aged subject. Two S100A10+ and  
196 two S100A10- astrocytes were analyzed per image, given a total of six astrocytes of each  
197 type per region, on each subject. Sholl analysis and quantifications of length, volume, and  
198 branch points were performed according to 2.6.

## 199 **2.8 Quantification of GFAP fluorescence intensity**

200 The quantification of GFAP fluorescence intensity was performed in 1440 astrocytes.  
201 This analysis was performed according to previous studies (Flores-Maldonado et al.,  
202 2020; Rosas-Arellano et al., 2016). Using the ImageJ “free hand” function the cytoplasm  
203 and processes of the astrocytes were outlined. Then, we quantified the fluorescence  
204 intensity of the selected area. The background signal was subtracted from the positive  
205 signal to obtain the relative intensity of the GFAP signal.

## 206 **2.9 Number and percentage of 8OHG+/AT100+ astrocytes per brain region**

207 To determine the number of astrocytes with damage to the RNA and tau  
208 hyperphosphorylation, we double-labeled GFAP+ astrocytes with 8OHG and AT100.  
209 Three images were captured on each region analyzed (DG, CA3, CA2-CA1, and ENT)  
210 with a 63x objective. All the images were captured with the following parameters: GFAP  
211 (optical gain 732 and offset – 3.0), 8OHG (optical gain 680, offset – 1.0), and AT100  
212 (optical gain 680, offset – 3.0). The quantification of GFAP+/8OHG+/AT100+astrocytes  
213 was performed using ImageJ software (Plugins---Analyze---Cell counter). The sum of  
214 double-labelled astrocytes in a certain region was divided by the total area analyzed. The  
215 total area analyzed was calculated by multiplying the area of a 63x image (0.034 mm<sup>2</sup>)  
216 by three (the number of images captured on every hippocampal region), resulting 0.10  
217 mm<sup>2</sup> in all regions analyzed.

218 To calculate the percentage of 8OHG+/AT100+/GFAP+ astrocytes, the sum of  
219 8OHG+/AT100+/GFAP+ astrocytes was multiplied by 100, and the final product was  
220 divided by the total amount of astrocytes in the region analyzed (the sum of  
221 8OHG+/AT100+/GFAP+ astrocytes plus the astrocytes with no labeling for 8OHG or  
222 AT100, respectively).

## 223 **2.10 Statistical analysis**

224 Statistical analysis was performed by one-way ANOVA, followed by a Tukey's as  
225 posthoc test, except for the quantification of astrocytic processes length using Sholl  
226 analysis where a multiple-t test followed by Holm-Sidak analysis by use of GraphPad  
227 Prism 6.0 software. Differences were considered statistically significant when  $p \leq 0.05$ .  
228 Data are presented as means  $\pm$  S.E.M.

229

230

231

## 232 **3. Results**

### 233 **3.1 The number of GFAP+ astrocytes did not decrease with age in the common** 234 **marmoset**

235 We quantified the number of GFAP+ astrocytes in DG, CA3, CA2-CA1, and ENT of  
236 adolescent, adult, old, and aged marmosets. There were no significant differences in the  
237 number of GFAP+ astrocytes in any brain region analyzed, except for a significant  
238 decrease in adult subjects compared to adolescents in DG and in ENT of aged subjects  
239 compared to old marmosets (figure 1). This result indicates that the population of GFAP+  
240 astrocytes remains similar during aging in the hippocampus and ENT of the marmoset.  
241 However, in adult and old animals, GFAP+ astrocytes had longer processes, and their  
242 labeling intensity was greater than in adolescent and adult individuals. Contrary,  
243 astrocytes of aged marmosets showed smaller process length and lower label intensity  
244 than astrocytes from the other age groups (figure 2). These morphological alterations  
245 suggest reactive astrogliosis in adult and old marmosets but astroglial atrophy in aged  
246 marmosets. To better characterize these morphological alterations in astrocytes, we used  
247 Sholl analysis.

248

### 249 **3.2 Astrocytic length, volume, and branching points decreased in different brain** 250 **regions in aged marmoset**

251 Using Sholl analysis we quantified the length, volume, and branching points of astrocytic  
252 processes of adolescent, adult, old, and aged marmosets, in DG, CA3, CA2-CA1, and  
253 ENT. We quantified the astrocytic processes length (APL) in adolescents (white circles  
254 curves), adults (grey circles curves), and old marmosets (black circles curves) (figure 2B  
255 and Supl. table 1). APL reaches a maximum between radius 4-7. This starts to decrease  
256 around radius 6-8 until reaching zero in radius 24. However, in aged marmosets (white

257 and black curves) the maximum amount of APL is reached between radius 2-4, and then  
258 it rapidly decreased (figure 2B).

259 In DG, astrocytes of adults and old marmosets present a significant increase of APL  
260 compared to adolescents (adolescents vs. adults: from radius 3 to 7 and from 9 to 15;  
261 adolescents vs. old: radius 5, 7 and 8. Suppl. table 1); however, in astrocytes of aged  
262 marmoset APL was significantly decreased compared to all other age groups (aged vs.  
263 adolescents: from radius 7 to 10; aged vs. adults: from radius 2 to 15; aged vs. old: from  
264 radius 4 to 12. Suppl. table 1). In CA3, adolescents, adults, and old marmosets present  
265 similar APL values (significant differences in radius 5, 6, and 8 of adolescents vs. adults.  
266 Suppl. table 1), while astrocytes of aged marmosets showed a significant decreased of  
267 APL compared to all other age groups (aged vs. adolescents: from radius 3 to 14; aged  
268 vs. adults: from radius 3 to 12; aged vs. old: from radius 3 to 13. Suppl. table 1). In CA2-  
269 CA1, astrocytes of adolescents and adults have similar amounts of APL (significant  
270 differences from radius 6 to 9. Suppl. table 1). However, astrocytes of old marmosets  
271 showed a higher APL compared to adolescents and adults (old vs. adolescents: from  
272 radius 5 to 14; old vs. adults: from radius 6 to 14. Suppl. table 1). In aged marmosets, the  
273 APL significantly decreased compared to adolescents, adults, and old (aged vs.  
274 adolescents: from radius 2 to 11; aged vs. adults: from radius 3 to 13; aged vs. old: from  
275 radius 3 to 15. Suppl. table 1). In ENT, adult and old marmosets had a significantly  
276 increased of APL compared to adolescents (adolescents vs. adults: from radius 5 to 9;  
277 adolescents vs. old: from radius 6 to 11. Suppl. table 1). Astrocytes of aged marmoset  
278 present a significantly decreased APL compared to all other age groups (aged vs.  
279 adolescents: from radius 1 to 12; aged vs. adults: from radius 1 to 13; aged vs. old: from  
280 radius 3 to 12. Table 1).

281 The total length of the astrocytic process (total APL), that is the sum of APL from the  
282 twenty-four radius for each astrocyte, was also quantified. In DG and ENT, the total APL

283 increased in adults and old subjects compared to adolescents and it significantly decreased  
284 in aged subjects. In CA3, adolescents, adults, and old marmosets have similar total APL,  
285 but in aged subjects, it was significantly decreased compared to all other age groups. In  
286 CA2-CA1, old marmosets present a significantly higher total APL compared to all other  
287 age groups (figure 2B).

288 Sholl analysis provides information as the caliber of the processes (volume) and the  
289 number of branch points. We analyzed the astrocytic processes volume (APV) in all  
290 regions studied. APV showed a similar trend to APL (figure 3C). In DG and ENT, the  
291 APV of adults and old subjects significantly increased with respect to adolescents and  
292 significantly decreased in aged subjects. In CA3, adolescent, adult, and old marmosets  
293 present similar APV. However, in aged marmosets, APV significantly decreased  
294 compared to all other age groups. In CA2-CA1, old marmosets have significantly higher  
295 APV compared to all other age groups.

296 The astrocytic branch points (ABP, figure 3D) in DG, CA3, CA2-CA1, and ENT, were  
297 also analyzed. ABP tended to increase from adolescents to old marmosets. Nonetheless,  
298 ABP of aged subjects was significantly decreased with respect to all the other groups.  
299 CA2-CA1 showed a different trend since in this region old subjects had a significantly  
300 higher ABP compared to all other groups. These results indicate that despite the number  
301 of GFAP+ astrocytes does not increase during aging, astrocytes develop alterations in the  
302 length of their processes, volume, and branching complexity.

303 Adults and old marmosets present an increased length and volume of the astrocytic  
304 processes compared to adolescents, probably reflecting a reactive role against age-related  
305 insults. However, in aged marmosets, the length/volume of the processes was decreased  
306 (as an indicator of astrocytic atrophy). The loss of branching complexity may impact the  
307 functions of these cells.

### 308 **3.3 Decreased GFAP-fluorescence intensity in astrocytes of aged marmosets**

309 Besides of morphological alterations in astrocytes of aged marmosets, we also observed  
310 alterations in the fluorescence intensity (suppl. figure 1A). In DG and ENT, adolescent,  
311 adult, and old marmosets have similar levels of GFAP-fluorescence intensity (GFAP-FI)  
312 (suppl. figure 1B). Contrary, aged marmosets showed a significantly decreased GFAP-FI  
313 concerning adolescents and old subjects. In CA3 and CA2-CA1, GFAP-FI significantly  
314 increased in old subjects with respect to adolescents and adults (supplementary figure  
315 1B); However, in aged marmosets, GFAP-FI significantly decreased compared to old  
316 subjects. The decrease of the GFAP-FI in astrocytes of aged marmosets may suggest a  
317 decreased expression of GFAP protein, the main component of the astrocyte cytoskeleton.  
318 However, as all the tissue available for this study is on PFA, we could not determine  
319 GFAP expression of its protein levels.

320

### 321 **3.4 RNA oxidation in astrocytes increased in the hippocampus of aged marmoset**

322 In a previous study, we observed an increase in RNA oxidation (8OHG) in aged marmoset  
323 brain (Rodríguez-Callejas et al., 2019). Neurons labeled with 8OHG+ were lightly  
324 detected in adolescent subjects but were significantly increased with aging. However,  
325 8OHG+ microglia were only observed in aged subjects. In this study, we noticed that  
326 8OHG+ astrocytes were almost absent in adolescent and adult marmosets. Nonetheless,  
327 old and aged subjects present abundant 8OHG+ astrocytes (figure 4). Quantification of  
328 8OHG+ astrocytes per area shows an increase of 8OHG+ astrocytes in old and aged  
329 marmosets compared to adolescents and adults (figure 4B). This dramatically increase of  
330 RNA oxidation in astrocytes of aged marmosets was confirmed when we calculated the  
331 percentage of 8OHG+ astrocytes (figure 4C). In aged subjects, the percentage of 8OHG+  
332 astrocytes reached approximately 50 to 80 % of the total astrocytes labeled with GFAP  
333 depending of the brain region (DG: 49.18 %; CA3: 67.59%; CA2-CA1: 80.89%; ENT:

334 71.46%), whereas in adolescent (DG: 2.96 %; CA3: 3.37 %; CA2-CA1: 8.58 %; ENT:  
335 9.38 %) and adults (DG: 4.57 %; CA3: 4.49 %; CA2-CA1: 3.92 %; ENT: 2.08 %) this  
336 percentage was lower.

337

### 338 **3.5 Nuclear hyperphosphorylated tau increased in astrocytes of marmoset with** 339 **aging**

340 In a previous study, we detected pTau in the residues Thr212 and Ser214 using AT100  
341 antibody. AT100 label were located in the nuclear compartment of cells (Rodriguez-  
342 Callejas et al., 2016). To determine if the morphological alterations observed in atrophic  
343 astrocytes were related to the presence of pTau, we performed a double labeling GFAP /  
344 AT100 in all brain regions analyzed. As shown in figure 5, adolescent marmosets had  
345 few astrocytes with AT100. In adult, old, and aged marmosets, this number increased in  
346 the four regions analyzed. The quantification of AT100+astrocytes per area shows an  
347 increase of AT100+ astrocytes in DG, CA3, and CA2-CA1 of adult and old marmosets  
348 compared to adolescents (not significant). However, in aged marmosets AT100+  
349 astrocytes decreased (not significant) compared to adult and old subjects. In ENT,  
350 AT100+ astrocytes significantly decreased in old and aged compared to adult subjects  
351 (figure 5B). We also calculated the percentage of AT100+ astrocytes per brain region  
352 analyzed (figure 5C). In the four regions analyzed, the percentage of AT100+ astrocytes  
353 increased in adult, old, and aged animals compared to adolescents. These results  
354 demonstrate that the presence of pTau increase with age in astrocytes of marmosets.

355

### 356 **3.6 S100A10+ astrocytes did not have an atrophic phenotype**

357 In models of cerebral ischemia, astrocytes associated with a neuroprotective role are  
358 labeled with S100A10 protein (Zamanian et al., 2012). To determine if atrophic astrocytes

359 lack S100A10 protein, we performed double immunolabeling: GFAP and S100A10. We  
360 decided to use aged marmosets, as this age group presents the largest number of atrophic  
361 astrocytes. Figure 6 shows representative images of S100A10- and S100A10+ astrocytes  
362 (panels A). It can be observed that in all regions analyzed, S100A10+astrocytes had  
363 longer processes than S100A10- astrocytes. The quantification of APL of S100A10- and  
364 S100A10+astrocytes demonstrate that Sholl curves of S100A10+ (yellow circles curves)  
365 and S100A10- (white squares curves) reach a maximum APL between radius 2 and 3  
366 (figure 6B). In all regions analyzed, APL in S100A10+ astrocytes were higher than in  
367 S100A10- astrocytes, with significant differences in radius 2,3, 4, and 6 in DG; radius 4-  
368 7 in CA3; radius 3,4 and 6 in CA2-CA1; radius 3 and 4 in ENT (Suppl. table 2). The  
369 quantification of total APL (figure 6C) demonstrates that S100A10+ astrocytes have  
370 significantly longer processes compared to S100A10- in CA3, CA2-CA1, and ENT.  
371 Concerning the quantification of the APV, S100A10+ astrocytes have significantly higher  
372 APV than S100A10- in DG, CA2-CA1, and ENT (figure 6D). Finally, the ABP was  
373 higher in S100A10+ in all regions, however, the differences were not significant (figure  
374 6E).

375 These results demonstrate that in aged marmoset brain, S100A10+ astrocytes are less  
376 prone to present atrophy, as longer astrocytic processes length and volume were observed  
377 in GFAP+/S100A10+ astrocytes, whereas astrocytes lacking S100A10 had distinctive  
378 morphological features of astroglial atrophy.

379

### 380 **3.7 DNA fragmentation was present in S100A10- astrocytes of aged marmosets**

381 To further determine if the atrophic phenotype and the lack of S100A10 were related to  
382 DNA damage, we used double-label immunofluorescence of GFAP and TUNEL reaction.  
383 We use this combination in the ENT, as this region showed a larger number of atrophic



384 astrocytes. We first quantified the number of cells positive for TUNEL staining in  
385 adolescent, adult, old, and aged marmosets. There were cells positive for TUNEL in all  
386 age groups. However, the total number of cells with TUNEL increased in aged marmosets  
387 (figure 7A). Then, we determined if the number of GFAP<sup>+</sup> and TUNEL<sup>+</sup> cells changed  
388 during aging in the marmoset. We observed that adult marmosets had more TUNEL<sup>+</sup>  
389 astrocytes compared to adolescents (figure 7B). In aged marmosets, more astrocytes were  
390 TUNEL<sup>+</sup> with respect to the other age groups (figure 7C, white arrowheads). These  
391 results denote an increased number of cells with DNA fragmentation during aging. In  
392 particular, aged marmosets had the highest number of astrocytes with DNA  
393 fragmentation. This finding coincides with the abundant astrocytes with atrophic  
394 phenotype in aged marmosets.

395 We aimed to determine if DNA fragmentation could be related to astrocyte atrophy  
396 (length of processes, branching points, and volume of dendrites). In addition, to  
397 understand if astrocyte atrophy could be related to a protective phenotype, we use  
398 S100A10 antibody in triple labeling (GFAP, S100A10, and TUNEL) in aged marmosets  
399 (figure 7D and E). Most S100A10<sup>+</sup> astrocytes do not present TUNEL labeling in their  
400 nucleus. In contrast, S100A10<sup>-</sup> astrocytes showed clear TUNEL labeling. Moreover,  
401 TUNEL<sup>+</sup> and S100A10<sup>-</sup> astrocytes present shorter processes and fewer branching points  
402 than S100A10<sup>+</sup> astrocytes. These results suggest that the S100A10<sup>+</sup> astrocytes are less  
403 vulnerable to DNA fragmentation and astrocyte atrophy during aging in marmosets.

404

405

406

407

408

## 409        **4. Discussion**

### 410        **4.1 Increased number of reactive astrocytes in adult and old marmosets**

411        In this study, we quantified the length, volume, and branch points of astrocytic processes  
412        from adolescents, adults, old, and aged marmosets in ENT and hippocampal region. We  
413        observed that in adult and old marmosets, astrocytes presented morphological features  
414        that resemble a reactive phenotype: increased length of processes and branching points  
415        compared to adolescent subjects (in DG and CA1-CA2). In contrast, aged marmosets  
416        presented shorter astrocytic processes in all regions analyzed, with morphological  
417        features of atrophic astrocytes. GFAP-FI increased in old marmosets in CA1-CA2 and  
418        CA3 regions compared to younger and older animals (Suppl. Figure 1). Despite the  
419        increased number of hypertrophic astrocytes in adult and old marmosets (increased  
420        processes length, volume, and branch points), the total number of astrocytes remains  
421        equal in all brain regions, except in DG (number of GFAP+ astrocytes were higher in  
422        adolescents vs. all ages) and ENT (number of GFAP+ astrocytes was lower in aged  
423        marmosets vs. all ages). Thus, our data indicate that adult and old marmosets develop  
424        mild astrogliosis, as astrocytes show hypertrophy and increased GFAP-FI, but without  
425        significant cellular proliferation.

426        Reactive astrogliosis is triggered in response to CNS injuries and diseases (Sofroniew and  
427        Vinters, 2010). It has been previously reported that old marmosets present amyloid  
428        plaques, pTau, enhanced concentrations of iron, RNA oxidation, and overactivation of  
429        microglia (Geula et al., 2002; Ridley et al., 2006; Rodriguez-Callejas et al., 2016;  
430        Rodríguez-Callejas et al., 2019; Sharma et al., 2019). All those factors may promote a  
431        reactive astrogliosis, as observed in the present study. It is important to note that CA2-  
432        CA1 region shows longer astrocytes in old marmosets compared to younger animals.  
433        These results coincide with our previous data, as CA2-CA1 is the region with the lowest

434 number of 8OHG+ cells, in comparison with ENT; ENT had the lowest glia activation,  
435 but the highest number of 8OHG+ cells (Rodríguez-Callejas et al., 2019)(Rodríguez-  
436 Callejas et al., 2019). Therefore, hypertrophic astrocytes in old marmosets could reflect  
437 a protective mechanism.

438

#### 439 **4.2 Astroglial atrophy in the hippocampus of aged marmosets**

440 In contrast to the hypertrophic phenotype observed in adult and old marmosets, aged  
441 subjects presented astrocytes with shorter process length, lower volume, and branch  
442 points, features of an atrophic phenotype, in all brain regions analyzed. Atrophy of GFAP+  
443 astrocytes has been observed in ENT of aged mice (18 and 24 months)(Rodríguez et al.,  
444 2014). In 3xTg-AD mice, a mouse model of AD, GFAP+ astrocytes showed signs of  
445 atrophy in DG, CA1, ENT, and prefrontal cortex compared to control mice (Verkhatsky  
446 et al., 2015). The presence of atrophic astrocytes has been reported even in young  
447 3xTgAD mice (1-month-old) in ENT compared to controls (Yeh et al., 2011). In brain  
448 samples of AD patients, a high number of atrophic astrocytes is observed, especially far  
449 from amyloid plaques (Matias et al., 2019). Contrary, hypertrophic astrocytes are found  
450 surrounding amyloid plaques (Matias et al., 2019). Pluripotent stem cells (iPSC)-derived  
451 astrocytes from Parkinson's disease patients develop an atrophic phenotype with a  
452 decreased mitochondrial activity, ATP production, increase of glycolysis, and production  
453 of reactive oxygen species (ROS) (Ramos-Gonzalez et al., 2021).

454 The region with the most significant astrocytic alterations in the marmoset was ENT. In  
455 humans, ENT neurons are highly vulnerable to alterations in glucose concentrations and  
456 hypoxia (Fehm et al., 2006; Mattsson et al., 2016), and age-related mitochondrial  
457 dysfunction (Chen and Chan, 2009; Lin and Beal, 2006; Roselli and Caroni, 2015).  
458 Moreover, ENT neurons of layer II are the most vulnerable to age-related alterations  
459 (Stranahan and Mattson, 2010). Thus, our data may indicate that the abundance of

460 atrophic astrocytes in ENT can be associated with the vulnerability of this brain region to  
461 the age-related metabolic and synaptic alterations. Therefore, the presence of atrophic  
462 astrocytes in hippocampus and ENT of aged marmosets indicates an ongoing  
463 neurodegenerative process beyond a normal aging process.

464

#### 465 **4.3 Abundant RNA oxidative damage in astrocytes of aged marmosets**

466 In all regions analyzed, old and aged marmosets had a significantly increased number of  
467 astrocytes with RNA oxidation (8OHG+) compared to adolescents and adults. In a  
468 previous study, Bellaver and co-workers proved that hippocampal astrocytes of aged rats  
469 present high levels of ROS, oxidation of RNA, and a decreased mitochondrial membrane  
470 potential (Bellaver et al., 2017). Oxidative stress in astrocytes of aged rats can be induced  
471 by the overexpression of proinflammatory cytokines, increased expression and activity of  
472 proinflammatory enzymes, and decreased activity and expression of antioxidant enzymes  
473 (Bellaver et al., 2017). Oxidative damage alters the expression of multiple proteins  
474 important for the astrocytic function (Bellaver et al., 2017), culminating in the atrophy of  
475 these cells. Therefore, RNA oxidation might be associated with the atrophic phenotype  
476 in astrocytes of old and aged marmosets.

477

#### 478 **4.4 Nuclear pTau in astrocytes of adult, old and aged marmosets**

479 In aging (Hof et al., 1996) and neurodegenerative diseases (i.e. AD, Down syndrome, and  
480 tauopathies) pTau causes its self-aggregation (Alonso et al., 1996, 2001, 2010; Despres  
481 et al., 2017; Liu et al., 2020) in straight and paired-helical filaments (PHF) which  
482 subsequently form the neurofibrillary tangles (NFT). In aged NHP, including the  
483 marmosets, pTau accumulation is observed in the hippocampus and cortex of old subjects  
484 (Darusman et al., 2014; Datta et al., 2021; Härtig et al., 2000; Oikawa et al., 2010;

485 Paspalas et al., 2018; Perez et al., 2013; Rodriguez-Callejas et al., 2016; Schultz et al.,  
486 2000b, 2000a). In a previous study, we observed AT100 immunoreactivity mainly in the  
487 nucleus of principal neurons from the granular layer and polymorphic layers of DG,  
488 and *str. pyramidale* of CA3 and CA2-CA1 in adult, old, and aged marmosets (Rodriguez-  
489 Callejas et al., 2016). In this study, we detected nuclear pTau (AT100+) in GFAP+  
490 astrocytes in ENT, CA3 and CA2-CA1. The percentage of GFAP+ astrocytes with  
491 nuclear pTau increased in adults, old and aged marmosets in DG, CA2-CA1, compared  
492 to adolescents.

493 *In vitro* studies demonstrate that tau binds nuclear DNA (single and double-stranded)  
494 (Hua et al., 2003; Krylova et al., 2005; Padmaraju et al., 2010) by the proline-riched  
495 domain and the microtubule-binding domain (Qi et al., 2015; Wei et al., 2008). DNA-tau  
496 binding increases the stability of the chromosomes (Camero et al., 2014; Rossi et al.,  
497 2008; Sjöberg et al., 2006) and protects the DNA against oxidative stress and  
498 hyperthermic conditions (Sultan et al., 2011; Wei et al., 2008). Diverse studies report the  
499 presence of nuclear pTau using AT100 antibody in fibroblast cultures (Rossi et al., 2008),  
500 rats (Gärtner et al., 1998), tree shrews (Rodriguez-Callejas et al., 2020), and humans (Gil  
501 et al., 2017; Hernández-Ortega et al., 2016). In human studies, the number of AT100+  
502 cells and the intensity of the label increase in the granular layer of DG and the *str.*  
503 *pyramidale* of CA1 in cognitive-healthy old subjects compared to adolescents and adults  
504 (Gil et al., 2017). However, in AD patients, the number of AT100+ cells significantly  
505 decreases as the disease progresses, indicating that the protective role of this pTau has  
506 been exhausted (Gil et al., 2017). In the current study, we observed an increased number  
507 of astrocytes with nuclear pTau (AT100) with aging in the hippocampus. However, in  
508 ENT, the number of astrocytes with nuclear pTau was decreased in aged marmosets. The  
509 reduction in the number of astrocytes with nuclear pTau can indicate a loss of its nuclear  
510 protective mechanism, similar to the late stages of AD (Gil et al., 2017).

#### 511 **4.5 Lack of S100A10 protein associates with atrophic astrocytes**

512 Lipopolysaccharide exposure and inflammatory insults cause the release of  
513 proinflammatory cytokines by reactive astrocytes (proinflammatory-phenotype)  
514 (Zamanian et al., 2012). Contrarily, reactive astrocytes can release neurotrophic factors  
515 in conditions such as ischemia, promoting tissue repair and recovery; these astrocytes are  
516 termed “neuroprotective-astrocytes” (Zamanian et al., 2012). Neuroprotective astrocytes  
517 can actively clear A $\beta$  and degrade it, protecting neurons against their neurotoxic effects  
518 (Xiao et al., 2014). In normal aging, proinflammatory astrocytes are the predominant type  
519 in the hippocampus and striatum of rodents (Clarke et al., 2018). In advanced stages of  
520 AD, reactive astrocytes lose their neuroprotective role, and instead, they release  
521 proinflammatory cytokines provoking neuronal damage and synapse degeneration (Lue  
522 et al., 1996; Perez-Nievas et al., 2013).

523 In old mice, astrocytes in the hippocampus and striatum show an up-regulation of genes  
524 related to the proinflammatory phenotype rather than neuroprotective-related genes.  
525 Moreover, in old animals, the number of astrocytes that express a proinflammatory  
526 marker (*C3*) is larger than astrocytes that express a neuroprotective specific gene (*Emp1*)  
527 (Clarke et al., 2018). In diverse neurodegenerative diseases, such as AD, Parkinson’s  
528 disease, Huntington, amyotrophic lateral sclerosis, and multiple sclerosis, astrocytes have  
529 a proinflammatory profile (Liddel et al., 2017). The increased number of  
530 proinflammatory astrocytes during aging and neurodegeneration may cause inflammation  
531 by releasing inflammatory cytokines and complement components (Jang et al., 2013;  
532 Liddel et al., 2017). Contrary, neuroprotective-type astrocytes express S100A10  
533 protein (Clarke et al., 2018). Here, we observed that S100A10<sup>+</sup> astrocytes had larger  
534 processes than S100A<sup>-</sup> astrocytes, in all regions analyzed. This may indicate that  
535 S100A10 protein confers neuroprotection against atrophy. We did not use a marker of  
536 proinflammatory astrocytes, that could help to determine whether this shift in morphology

537 and lack of S100A10 protein is associated with a specific reactive state. Thus, future  
538 studies are needed to determine better the molecular profile of the reactive astrocytes in  
539 the selected brain regions of the marmoset during the aging process.

540

#### 541 **4.6 DNA fragmentation is found in S100A10- astrocytes**

542 Apoptosis is a mechanism of regulated cell death that occurs under normal physiological  
543 conditions but also plays a crucial role in diverse pathologies (Bertheloot et al., 2021; Xu  
544 et al., 2019). Apoptosis induces morphological and biochemical changes in the cells, such  
545 as cell and nuclear shrinkage, chromatin condensation (pyknosis), DNA fragmentation,  
546 and membrane-bound cell fragments (apoptotic bodies) (Majtnerová and Roušar, 2018;  
547 Xu et al., 2019). DNA fragmentation is the main feature of apoptosis and can be  
548 determined by TUNEL staining (Arends et al., 1990; Walker et al., 1994). In marmosets,  
549 we observed an increased number of TUNEL+ nuclei in aged subjects compared to  
550 adolescents and adults (Figure 7). In aged marmosets, most astrocytes were TUNEL+,  
551 coinciding with the significant increase of atrophic astrocytes. To further understand this  
552 correlation, we labeled GFAP+ astrocytes with S100A10 and TUNEL in the hippocampus  
553 of aged marmosets. Most S100A10- astrocytes were positive for TUNEL staining. On the  
554 other hand, most of the S100A10+ astrocytes did not show TUNEL labeling. These  
555 results suggest that S100A10+ protein protects astrocytes from presenting DNA  
556 fragmentation and an atrophic phenotype.

557

#### 558 **Conclusion**

559 Our results show that adult and old marmosets had a reactive astrogliosis in the  
560 hippocampus and ENT compared to adolescent and aged marmosets. However, aged  
561 marmosets show morphological alterations in all regions analyzed, as they present a

562 prominent atrophic phenotype. In addition, damage to RNA was observed in astrocytes  
563 of old and aged marmosets compared to younger animals. Nuclear pTau was detected in  
564 astrocytes of all regions analyzed showing an age-dependent increase in hippocampal  
565 regions. However, in ENT the number of astrocytes with nuclear pTau was reduced in  
566 aged marmosets. Furthermore, neuroprotective-type astrocytes (S100A10+) had an  
567 elongated morphology (length, volume, and branch points; hypertrophic) than S100A10+  
568 astrocytes (atrophic). Neuroprotective-type astrocytes (S100A10+) did not presented  
569 DNA fragmentation, whereas lack of S100A10 associated with DNA damage. Here we  
570 show alterations in astrocytes' activation during aging in marmosets, with an enhanced  
571 reactivity in adult and old animals, but morphological modifications (atrophy) in aged  
572 animals that go beyond normal aging. Thus, our data contribute to the growing body of  
573 literature underpinning the use of the marmoset as a suitable animal model to investigate  
574 the etiological factors and processes associated with neurodegeneration.

575

576

577

578

579

580

581

582

## 583 **References**

584 Abbott, D., Barnett, D., 2003. Aspects of common marmoset basic biology and life  
585 history important for biomedical research. *Comp. Med.* 53, 339–350.



- 586 Abbott, N.J., Rönnbäck, L., Hansson, E., 2006. Astrocyte-endothelial interactions at the  
587 blood-brain barrier. *Nat. Rev. Neurosci.* 7, 41–53. <https://doi.org/10.1038/nrn1824>
- 588 Alonso, a C., Grundke-Iqbal, I., Iqbal, K., 1996. Alzheimer’s disease  
589 hyperphosphorylated tau sequesters normal tau into tangles of filaments and  
590 disassembles microtubules. *Nat. Med.* 2, 783–787.  
591 <https://doi.org/10.1038/nm0796-783>
- 592 Alonso, A., Zaidi, T., Novak, M., Grundke-Iqbal, I., Iqbal, K., 2001.  
593 Hyperphosphorylation induces self-assembly of tau into tangles of paired helical  
594 filaments/straight filaments. *Proc. Natl. Acad. Sci. U. S. A.* 98, 6923–8.  
595 <https://doi.org/10.1073/pnas.121119298>
- 596 Alonso, A.D., Di Clerico, J., Li, B., Corbo, C.P., Alaniz, M.E., Grundke-Iqbal, I., Iqbal,  
597 K., 2010. Phosphorylation of Tau at Thr212, Thr231, and Ser262 combined causes  
598 neurodegeneration. *J. Biol. Chem.* 285, 30851–30860.  
599 <https://doi.org/10.1074/jbc.M110.110957>
- 600 Anderson, C.M., Swanson, R.A., 2000. Astrocyte glutamate transport: Review of  
601 properties, regulation, and physiological functions. *Glia* 32, 1–14.  
602 [https://doi.org/10.1002/1098-1136\(200010\)32:1<1::AID-GLIA10>3.0.CO;2-W](https://doi.org/10.1002/1098-1136(200010)32:1<1::AID-GLIA10>3.0.CO;2-W)
- 603 Arends, M.J., Morris, R.G., Wyllie, A.H., 1990. Apoptosis. The role of the  
604 endonuclease. *Am. J. Pathol.* 136, 593–608.
- 605 Beauquis, J., Pavía, P., Pomilio, C., Vinuesa, A., Podlutskaya, N., Galvan, V., Saravia,  
606 F., 2013. Environmental enrichment prevents astroglial pathological changes in the  
607 hippocampus of APP transgenic mice, model of Alzheimer’s disease. *Exp. Neurol.*  
608 239, 28–37. <https://doi.org/10.1016/j.expneurol.2012.09.009>
- 609 Bellaver, B., Souza, D.G., Souza, D.O., Quincozes-Santos, A., 2017. Hippocampal  
610 astrocyte cultures from adult and aged rats reproduce changes in glial functionality

- 611 observed in the aging brain. *Mol. Neurobiol.* 54, 2969–2985.  
612 <https://doi.org/10.1007/s12035-016-9880-8>
- 613 Bertheloot, D., Latz, E., Franklin, B.S., 2021. Necroptosis, pyroptosis and apoptosis: an  
614 intricate game of cell death. *Cell. Mol. Immunol.* 18, 1106–1121.  
615 <https://doi.org/10.1038/s41423-020-00630-3>
- 616 Brown, A.M., Ransom, B.R., 2007. Astrocyte glycogen and brain energy metabolism.  
617 *Glia* 55, 1263–1271. <https://doi.org/10.1002/glia.20557>
- 618 Brown, A.M., Sickmann, H.M., Fosgerau, K., Lund, T.M., Schousboe, A.,  
619 Waagepetersen, H.S., Ransom, B.R., 2005. Astrocyte glycogen metabolism is  
620 required for neural activity during aglycemia or intense stimulation in mouse white  
621 matter. *J. Neurosci. Res.* 79, 74–80. <https://doi.org/10.1002/jnr.20335>
- 622 Camero, S., Benítez, M.J., Barrantes, A., Ayuso, J.M., Cuadros, R., Ávila, J., Jiménez,  
623 J.S., 2014. Tau protein provides DNA with thermodynamic and structural features  
624 which are similar to those found in histone-DNA complex. *J. Alzheimer's Dis.* 39,  
625 649–660. <https://doi.org/10.3233/JAD-131415>
- 626 Cameron, B., Landreth, G.E., 2010. Inflammation, microglia, and Alzheimer's disease.  
627 *Neurobiol. Dis.* 37, 503–509. <https://doi.org/10.1016/j.nbd.2009.10.006>
- 628 Canchi, S., Sarntinoranont, M., Hong, Y., Flint, J.J., Subhash, G., King, M.A., 2017.  
629 Simulated blast overpressure induces specific astrocyte injury in an ex vivo brain  
630 slice model. *PLoS One* 12, 1–21. <https://doi.org/10.1371/journal.pone.0175396>
- 631 Chen, H., Chan, D.C., 2009. Mitochondrial dynamics-fusion, fission, movement, and  
632 mitophagy-in neurodegenerative diseases. *Hum. Mol. Genet.* 18, 169–176.  
633 <https://doi.org/10.1093/hmg/ddp326>
- 634 Clarke, L.E., Liddelow, S.A., Chakraborty, C., Münch, A.E., Heiman, M., Barres, B.A.,  
635 2018. Normal aging induces A1-like astrocyte reactivity. *Proc. Natl. Acad. Sci. U.*

- 636 S. A. 115, E1896–E1905. <https://doi.org/10.1073/pnas.1800165115>
- 637 Connor, J.R., Menzies, S.L., St. Martin, S., Mufson, E.J., 1990. The cellular distribution  
638 of transferrin, ferritin and iron in the human brain. *J. Neurosci. Res.* 27, 595–611.
- 639 Cotrina, M.L., Nedergaard, M., 2002. Astrocytes in the aging brain. *J. Neurosci. Res.*  
640 67, 1–10. <https://doi.org/10.1002/jnr.10121>
- 641 Daneman, R., Prat, A., 2015. The blood-brain barrier. *Neuroimmune Pharmacol.* 1–23.  
642 <https://doi.org/10.1101/cshperspect.a020412>
- 643 Darusman, H.S., Gjedde, A., Sajuthi, D., Schapiro, S.J., Kalliokoski, O.,  
644 Kristianingrum, Y.P., Handaryani, E., Hau, J., 2014. Amyloid beta1-42 and the  
645 phosphorylated tau threonine 231 in brains of aged Cynomolgus monkeys (*Macaca*  
646 *fascicularis*). *Front. Aging Neurosci.* 6, 1–7.  
647 <https://doi.org/10.3389/fnagi.2014.00313>
- 648 Datta, D., Leslie, S.N., Wang, M., Morozov, Y.M., Yang, S., Mentone, S.A., Zeiss, C.,  
649 Duque, A., Rakic, P., Horvath, T.L., van Dyck, C.H., Nairn, A.C., Arnsten, A.F.T.,  
650 2021. Age-related calcium dysregulation linked with tau pathology and impaired  
651 cognition in non-human primates. *Alzheimer's Dement.* 17, 920–932.  
652 <https://doi.org/10.1002/alz.12325>
- 653 De Castro, V., Girard, P., 2021. Location and temporal memory of objects declines in  
654 aged marmosets (*Callithrix jacchus*). *Sci. Rep.* 11, 1–15.  
655 <https://doi.org/10.1038/s41598-021-88357-7>
- 656 Despres, C., Byrne, C., Qi, H., Cantrelle, F.X., Huvent, I., Chambraud, B., Baulieu,  
657 E.E., Jacquot, Y., Landrieu, I., Lippens, G., Smet-Nocca, C., 2017. Identification  
658 of the Tau phosphorylation pattern that drives its aggregation. *Proc. Natl. Acad.*  
659 *Sci. U. S. A.* 114, 9080–9085. <https://doi.org/10.1073/pnas.1708448114>
- 660 Fehm, H.L., Kern, W., Peters, A., 2006. The selfish brain: competition for energy

- 661 resources. *Prog. Brain Res.* 153, 129–140. <https://doi.org/10.1016/S0079->  
662 [6123\(06\)53007-9](https://doi.org/10.1016/S0079-6123(06)53007-9)
- 663 Flores-Maldonado, C., Albino-Sánchez, M.E., Rodríguez-Callejas, J.D., Estrada-  
664 Mondragon, A., León-Galicia, I., Maqueda-Alfaro, R., Perez-Cruz, C., Fuchs, E.,  
665 García-Carrancá, A., Contreras, R.G., Missirlis, F., Rosas-Arellano, A., 2020. A  
666 low cost antibody signal enhancer improves immunolabeling in cell culture,  
667 primate brain and human cancer biopsy. *Neuroscience* 439, 275–286.  
668 <https://doi.org/10.1016/j.neuroscience.2020.01.009>
- 669 Franco, R., Fernández-Suárez, D., 2015. Alternatively activated microglia and  
670 macrophages in the central nervous system. *Prog. Neurobiol.* 131, 65–86.  
671 <https://doi.org/10.1016/j.pneurobio.2015.05.003>
- 672 Gärtner, U., Janke, C., Holzer, M., Vanmechelen, E., Arendt, T., 1998. Postmortem  
673 changes in the phosphorylation state of tau-protein in the rat brain. *Neurobiol.*  
674 *Aging* 19, 535–543. [https://doi.org/10.1016/S0197-4580\(98\)00094-3](https://doi.org/10.1016/S0197-4580(98)00094-3)
- 675 Geula, C., Nagykerly, N., Wu, C.-K., 2002. Amyloid- $\beta$  deposits in the cerebral cortex of  
676 the aged common marmoset (*Callithrix jacchus*): incidence and chemical  
677 composition. *Acta Neuropathol.* 103, 48–58.  
678 <https://doi.org/10.1007/s004010100429>
- 679 Gil, L., Federico, C., Pinedo, F., Bruno, F., Rebolledo, A.B., Montoya, J.J., Olazabal,  
680 I.M., Ferrer, I., Saccone, S., 2017. Aging dependent effect of nuclear tau. *Brain*  
681 *Res.* 1677, 129–137. <https://doi.org/10.1016/j.brainres.2017.09.030>
- 682 Härtig, W., Klein, C., Brauer, K., Schüppel, K.F., Arendt, T., Brückner, G., Bigl, V.,  
683 2000. Abnormally phosphorylated protein tau in the cortex of aged individuals of  
684 various mammalian orders. *Acta Neuropathol.* 100, 305–312.  
685 <https://doi.org/10.1007/s004010000183>

- 686 Hernández-Ortega, K., Garcia-Esparcia, P., Gil, L., Lucas, J.J., Ferrer, I., 2016. Altered  
687 machinery of protein synthesis in Alzheimer's: From the nucleolus to the  
688 ribosome. *Brain Pathol.* 26, 593–605. <https://doi.org/10.1111/bpa.12335>
- 689 Hoepken, H.H., Korten, T., Robinson, S.R., Dringen, R., 2004. Iron accumulation iron  
690 mediated toxicity and altered levels of ferritin and transferrin receptor in cultured  
691 astrocytes.pdf. *J. Neurochem.* 88, 1194–1202. [https://doi.org/10.1046/j.1471-](https://doi.org/10.1046/j.1471-4159.2003.02236.x)  
692 4159.2003.02236.x
- 693 Hof, P.R., Glannakopoulos, P., Bouras, C., 1996. The neuropathological changes  
694 associated with normal brain aging. *Histol. Histopathol.* 11, 1075–1088.
- 695 Hol, E.M., Pekny, M., 2015. Glial fibrillary acidic protein (GFAP) and the astrocyte  
696 intermediate filament system in diseases of the central nervous system. *Curr. Opin.*  
697 *Cell Biol.* 32, 121–130. <https://doi.org/10.1016/j.ceb.2015.02.004>
- 698 Hua, Q., He, R.Q., Haque, N., Qu, M.H., Del Carmen Alonso, A., Grundke-Iqbal, I.,  
699 Iqbal, K., 2003. Microtubule associated protein tau binds to double-stranded but  
700 not single-stranded DNA. *Cell. Mol. Life Sci.* 60, 413–421.  
701 <https://doi.org/10.1007/s000180300034>
- 702 Ishii, T., Takanashi, Y., Sugita, K., Miyazawa, M., Yanagihara, R., Yasuda, K.,  
703 Onouchi, H., Kawabe, N., Nakata, M., Yamamoto, Y., Hartman, P.S., Ishii, N.,  
704 2017. Endogenous reactive oxygen species cause astrocyte defects and neuronal  
705 dysfunctions in the hippocampus: a new model for aging brain. *Aging Cell* 16, 39–  
706 51. <https://doi.org/10.1111/accel.12523>
- 707 Jang, E., Kim, Jong-Heon, Lee, S., Kim, Jae-Hong, Seo, J.-W., Jin, M., Lee, M.-G.,  
708 Jang, I.-S., Lee, W.-H., Suk, K., 2013. Phenotypic Polarization of Activated  
709 Astrocytes: The Critical Role of Lipocalin-2 in the Classical Inflammatory  
710 Activation of Astrocytes. *J. Immunol.* 191, 5204–5219.

- 711 <https://doi.org/10.4049/jimmunol.1301637>
- 712 Janzer, R.C., Raff, M.C., 1987. Astrocytes induce blood-brain barrier properties in  
713 endothelial cells. *Nature*. <https://doi.org/10.1038/325253a0>
- 714 Jyothi, H.J., Vidyadhara, D.J., Mahadevan, A., Philip, M., Parmar, S.K., Manohari,  
715 S.G., Shankar, S.K., Raju, T.R., Alladi, P.A., 2015. Aging causes morphological  
716 alterations in astrocytes and microglia in human substantia nigra pars compacta.  
717 *Neurobiol. Aging* 36, 3321–3333.  
718 <https://doi.org/10.1016/j.neurobiolaging.2015.08.024>
- 719 Kabba, J.A., Xu, Y., Christian, H., Ruan, W., Chenai, K., Xiang, Y., Zhang, L.,  
720 Saavedra, J.M., Pang, T., 2017. Microglia: Housekeeper of the central nervous  
721 system. *Cell. Mol. Neurobiol.* <https://doi.org/10.1007/s10571-017-0504-2>
- 722 Kanaan, N.M., Kordower, J.H., Collier, T.J., 2010. Age-related changes in glial cells of  
723 dopamine midbrain subregions in rhesus monkeys. *Neurobiol. Aging* 31, 937–952.  
724 <https://doi.org/10.1016/j.neurobiolaging.2008.07.006>
- 725 Kimelberg, H.K., 2004. The problem of astrocyte identity. *Neurochem. Int.* 45, 191–  
726 202. <https://doi.org/10.1016/j.neuint.2003.08.015>
- 727 Kohama, S.G., Goss, J.R., Finch, C.E., McNeill, T.H., 1995. Increases of glial fibrillary  
728 acidic protein in the aging female mouse brain. *Neurobiol. Aging* 16, 59–67.  
729 [https://doi.org/10.1016/0197-4580\(95\)80008-F](https://doi.org/10.1016/0197-4580(95)80008-F)
- 730 Kramer, R., Burns, M., 2019. Chapter 6 - Normal Clinical and Biological Parameters of  
731 the Common Marmoset (*Callithrix jacchus*), in: Marini, R., Wachtman, L., Tardif,  
732 S., Mansfield, K., Fox, J. (Eds.), *The Common Marmoset in Captivity and*  
733 *Biomedical Research*, American College of Laboratory Animal Medicine.  
734 Academic Press, pp. 93–107. [https://doi.org/https://doi.org/10.1016/B978-0-12-](https://doi.org/https://doi.org/10.1016/B978-0-12-811829-0.00006-6)  
735 [811829-0.00006-6](https://doi.org/https://doi.org/10.1016/B978-0-12-811829-0.00006-6)

- 736 Krylova, S.M., Musheev, M., Nutiu, R., Li, Y., Lee, G., Krylov, S.N., 2005. Tau protein  
737 binds single-stranded DNA sequence specifically - The proof obtained in vitro with  
738 non-equilibrium capillary electrophoresis of equilibrium mixtures. *FEBS Lett.* 579,  
739 1371–1375. <https://doi.org/10.1016/j.febslet.2005.01.032>
- 740 Kulijewicz-Nawrot, M., Verkhatsky, A., Chvátal, A., Syková, E., Rodríguez, J.J., 2012.  
741 Astrocytic cytoskeletal atrophy in the medial prefrontal cortex of a triple transgenic  
742 mouse model of Alzheimer's disease. *J. Anat.* 221, 252–262.  
743 <https://doi.org/10.1111/j.1469-7580.2012.01536.x>
- 744 Lei, M., Hua, X., Xiao, M., Ding, J., Han, Q., Hu, G., 2008. Impairments of astrocytes  
745 are involved in the d-galactose-induced brain aging. *Biochem. Biophys. Res.*  
746 *Commun.* 369, 1082–1087. <https://doi.org/10.1016/j.bbrc.2008.02.151>
- 747 Liddelow, S.A., Guttenplan, K.A., Clarke, L.E., Bennett, F.C., Bohlen, C.J., Schirmer,  
748 L., Bennett, M.L., Münch, A.E., Chung, W.S., Peterson, T.C., Wilton, D.K.,  
749 Frouin, A., Napier, B.A., Panicker, N., Kumar, M., Buckwalter, M.S., Rowitch,  
750 D.H., Dawson, V.L., Dawson, T.M., Stevens, B., Barres, B.A., 2017. Neurotoxic  
751 reactive astrocytes are induced by activated microglia. *Nature* 541, 481–487.  
752 <https://doi.org/10.1038/nature21029>
- 753 Lin, M.T., Beal, M.F., 2006. Mitochondrial dysfunction and oxidative stress in  
754 neurodegenerative diseases. *Nature* 443, 787–795.  
755 <https://doi.org/10.1038/nature05292>
- 756 Liu, M., Sui, D., Dexheimer, T., Hovde, S., Deng, X., Wang, K.W., Lin, H.L., Chien,  
757 H.T., Kweon, H.K., Kuo, N.S., Ayoub, C.A., Jimenez-Harrison, D., Andrews,  
758 P.C., Kwok, R., Bochar, D.A., Kuret, J., Fortin, J., Tsay, Y.G., Kuo, M.H., 2020.  
759 Hyperphosphorylation Renders Tau Prone to Aggregate and to Cause Cell Death.  
760 *Mol. Neurobiol.* 57, 4704–4719. <https://doi.org/10.1007/s12035-020-02034-w>

- 761 Lü, L., Li, J., Yew, D.T., Rudd, J.A., Mak, Y.T., 2008. Oxidative stress on the  
762 astrocytes in culture derived from a senescence accelerated mouse strain.  
763 *Neurochem. Int.* 52, 282–289. <https://doi.org/10.1016/j.neuint.2007.06.016>
- 764 Lue, L., Brachova, L., Harold Civin, W., Rogers, J., 1996. Inflammation A $\beta$  deposition,  
765 and NFT formation as correlates of AD neurodegeneration.pdf. *J. Neuropathol.*  
766 *Exp. Neurol.* 55, 1083–1088. <https://doi.org/10.1097/00005072-199655100-00008>
- 767 Maclean, C.J., Baker, H.F., Ridley, R.M., Mori, H., 2000. Naturally occurring and  
768 experimentally induced beta-amyloid deposits in the brains of marmosets  
769 (*Callithrix jacchus*). *J. Neural Transm.* 107, 799–814.  
770 <https://doi.org/10.1007/s007020070060>
- 771 Magistretti, P.J., 2006. Neuron-glia metabolic coupling and plasticity. *J. Exp. Biol.* 209,  
772 2304–2311. <https://doi.org/10.1242/jeb.02208>
- 773 Majtnerová, P., Roušar, T., 2018. An overview of apoptosis assays detecting DNA  
774 fragmentation. *Mol. Biol. Rep.* 45, 1469–1478. [https://doi.org/10.1007/s11033-](https://doi.org/10.1007/s11033-018-4258-9)  
775 [018-4258-9](https://doi.org/10.1007/s11033-018-4258-9)
- 776 Matias, I., Morgado, J., Gomes, F.C.A., 2019. Astrocyte heterogeneity: Impact to brain  
777 aging and disease. *Front. Aging Neurosci.* 11, 1–18.  
778 <https://doi.org/10.3389/fnagi.2019.00059>
- 779 Matsui, T., Omuro, H., Liu, Y.F., Soya, M., Shima, T., Mcewen, B.S., Soya, H., 2017.  
780 Astrocytic glycogen-derived lactate fuels the brain during exhaustive exercise to  
781 maintain endurance capacity. *Proc. Natl. Acad. Sci. U. S. A.* 114, 6358–6363.  
782 <https://doi.org/10.1073/pnas.1702739114>
- 783 Mattsson, N., Schott, J.M., Hardy, J., Turner, M.R., Zetterberg, H., 2016. Selective  
784 vulnerability in neurodegeneration: Insights from clinical variants of Alzheimer’s  
785 disease. *J. Neurol. Neurosurg. Psychiatry* 87, 1000–1004.



- 786 <https://doi.org/10.1136/jnnp-2015-311321>
- 787 Nichols, N.R., Day, J.R., Laping, N.J., Johnson, S.A., Finch, C.E., 1993. GFAP mRNA  
788 increases with age in rat and human brain. *Neurobiol. Aging* 14, 421–429.  
789 [https://doi.org/10.1016/0197-4580\(93\)90100-P](https://doi.org/10.1016/0197-4580(93)90100-P)
- 790 Oide, T., Yoshida, K., Kaneko, K., Ohta, M., Arima, K., 2006. Iron overload and  
791 antioxidative role of perivascular astrocytes in aceruloplasminemia. *Neuropathol.*  
792 *Appl. Neurobiol.* 32, 170–176. <https://doi.org/10.1111/j.1365-2990.2006.00710.x>
- 793 Oikawa, N., Kimura, N., Yanagisawa, K., 2010. Alzheimer-type tau pathology in  
794 advanced aged nonhuman primate brains harboring substantial amyloid deposition.  
795 *Brain Res.* 1315, 137–149. <https://doi.org/10.1016/j.brainres.2009.12.005>
- 796 Okano, H., Hikishima, K., Iriki, A., Sasaki, E., 2012. The common marmoset as a novel  
797 animal model system for biomedical and neuroscience research applications.  
798 *Semin. Fetal Neonatal Med.* 17, 336–340.  
799 <https://doi.org/10.1016/j.siny.2012.07.002>
- 800 Olabarria, M., Noristani, H.N., Verkhratsky, A., Rodríguez, J.J., 2010. Concomitant  
801 astroglial atrophy and astrogliosis in a triple transgenic animal model of  
802 Alzheimer's disease. *Glia* 58, 831–838. <https://doi.org/10.1002/glia.20967>
- 803 Orihuela, R., McPherson, C.A., Harry, G.J., 2016. Microglial M1/M2 polarization and  
804 metabolic states. *Br. J. Pharmacol.* 173, 649–665.  
805 <https://doi.org/10.1111/bph.13139>
- 806 Padmaraju, V., Indi, S.S., Rao, K.S.J., 2010. New evidences on Tau-DNA interactions  
807 and relevance to neurodegeneration. *Neurochem. Int.* 57, 51–57.  
808 <https://doi.org/10.1016/j.neuint.2010.04.013>
- 809 Palazzi, X., Switzer, R., George, C., 2006. Natural occurrence of amyloid-A $\beta$  deposits  
810 in the brain of young common marmosets (*Callithrix jacchus*): A morphological

- 811 and immunohistochemical evaluation. *Vet. Pathol.* 43, 777–779.  
812 <https://doi.org/10.1354/vp.43-5-777>
- 813 Paspalas, C.D., Carlyle, B.C., Leslie, S., Preuss, T.M., Crimins, J.L., Huttner, A.J., van  
814 Dyck, C.H., Rosene, D.L., Nairn, A.C., Arnsten, A.F.T., 2018. The aged rhesus  
815 macaque manifests Braak stage III/IV Alzheimer’s-like pathology. *Alzheimer’s*  
816 *Dement.* 14, 680–691. <https://doi.org/10.1016/j.jalz.2017.11.005>
- 817 Paxinos, G., Watson, C., Petrides, M., Rosa, M., Tokuno, H., 2012. The marmoset brain  
818 in stereotaxic coordinates, First edit. ed. Elsevier Inc., San Diego, CA, USA.
- 819 Perez-Nievas, B.G., Stein, T.D., Tai, H.C., Dols-Icardo, O., Scotton, T.C., Barroeta-  
820 Espar, I., Fernandez-Carballo, L., De Munain, E.L., Perez, J., Marquie, M.,  
821 Serrano-Pozo, A., Frosch, M.P., Lowe, V., Parisi, J.E., Petersen, R.C., Ikonomic,  
822 M.D., López, O.L., Klunk, W., Hyman, B.T., Gómez-Isla, T., 2013. Dissecting  
823 phenotypic traits linked to human resilience to Alzheimer’s pathology. *Brain* 136,  
824 2510–2526. <https://doi.org/10.1093/brain/awt171>
- 825 Perez, S.E., Raghanti, M.A., Hof, P.R., Kramer, L., Ikonomic, M.D., Lacor, P.N.,  
826 Erwin, J.M., Sherwood, C.C., Mufson, E.J., 2013. Alzheimer’s disease pathology  
827 in the neocortex and hippocampus of the western lowland gorilla (*Gorilla gorilla*  
828 *gorilla*). *J. Comp. Neurol.* 521, 4318–38. <https://doi.org/10.1002/cne.23428>
- 829 Philippens, I.H., Ormel, P.R., Baarends, G., Johansson, M., Remarque, E.J., Doverskog,  
830 M., 2016. Acceleration of amyloidosis by inflammation in the amyloid-beta  
831 marmoset monkey model of Alzheimer’s disease. *J. Alzheimer’s Dis.* 55, 101–113.  
832 <https://doi.org/10.3233/JAD-160673>
- 833 Qi, H., Cantrelle, F.X., Benhelli-Mokrani, H., Smet-Nocca, C., Buée, L., Lippens, G.,  
834 Bonnefoy, E., Galas, M.C., Landrieu, I., 2015. Nuclear magnetic resonance  
835 spectroscopy characterization of interaction of Tau with DNA and its regulation by

- 836 phosphorylation. *Biochemistry* 54, 1525–1533. <https://doi.org/10.1021/bi5014613>
- 837 Ramos-Gonzalez, P., Mato, S., Chara, J.C., Verkhatsky, A., Matute, C., Cavaliere, F.,  
838 2021. Astrocytic atrophy as a pathological feature of Parkinson's disease with  
839 LRRK2 mutation. *npj Park. Dis.* 7, 1–11. [https://doi.org/10.1038/s41531-021-](https://doi.org/10.1038/s41531-021-00175-w)  
840 00175-w
- 841 Regan, R.F., Kumar, N., Gao, F., Guo, Y., 2002. Ferritin induction protects cortical  
842 astrocytes from heme-mediated oxidative injury. *Neuroscience* 113, 985–994.  
843 [https://doi.org/10.1016/S0306-4522\(02\)00243-9](https://doi.org/10.1016/S0306-4522(02)00243-9)
- 844 Ridley, R.M., Baker, H.F., Windle, C.P., Cummings, R.M., 2006. Very long term  
845 studies of the seeding of  $\beta$ -amyloidosis in primates. *J. Neural Transm.* 113, 1243–  
846 1251. <https://doi.org/10.1007/s00702-005-0385-2>
- 847 Rodríguez-Callejas, J., Cuervo-Zanatta, D., Rosas-Arellano, A., Fonta, C., Fuchs, E.,  
848 Perez-Cruz, C., 2019. Loss of ferritin-positive microglia relates to increased iron,  
849 RNA oxidation, and dystrophic microglia in the brains of aged male marmosets.  
850 *Am. J. Primatol.* 81, 1–19. <https://doi.org/10.1002/ajp.22956>
- 851 Rodríguez-Callejas, J., Fuchs, E., Perez-Cruz, C., 2016. Evidence of tau  
852 hyperphosphorylation and dystrophic microglia in the common marmoset. *Front.*  
853 *Aging Neurosci.* 8, 1–15. <https://doi.org/10.3389/fnagi.2016.00315>
- 854 Rodríguez-Callejas, J., Fuchs, E., Perez-Cruz, C., 2020. Increased oxidative stress,  
855 hyperphosphorylation of tau, and dystrophic microglia in the hippocampus of aged  
856 *Tupaia belangeri*. *Glia* 1–19. <https://doi.org/10.1002/glia.23804>
- 857 Rodríguez, J.J., Yeh, C.Y., Terzieva, S., Olabarria, M., Kulijewicz-Nawrot, M.,  
858 Verkhatsky, A., 2014. Complex and region-specific changes in astroglial markers  
859 in the aging brain. *Neurobiol. Aging* 35, 15–23.  
860 <https://doi.org/10.1016/j.neurobiolaging.2013.07.002>

- 861 Rosas-Arellano, A., Villalobos-González, J.B., Palma-Tirado, L., Beltrán, F.A.,  
862 Cárabez-Trejo, A., Missirlis, F., Castro, M.A., 2016. A simple solution for  
863 antibody signal enhancement in immunofluorescence and triple immunogold  
864 assays. *Histochem. Cell Biol.* 146, 421–430. [https://doi.org/10.1007/s00418-016-](https://doi.org/10.1007/s00418-016-1447-2)  
865 1447-2
- 866 Roselli, F., Caroni, P., 2015. From intrinsic firing properties to selective neuronal  
867 vulnerability in neurodegenerative diseases. *Neuron* 85, 901–910.  
868 <https://doi.org/10.1016/j.neuron.2014.12.063>
- 869 Ross, C.N., Salmon, A.B., 2018. Aging research using the common marmoset: Focus on  
870 aging interventions. *Nutr. Heal. Aging* 1–13. <https://doi.org/10.3233/NHA-180046>
- 871 Rossi, G., Dalprà, L., Crosti, F., Lissoni, S., Sciacca, F.L., Catania, M., Di Fede, G.,  
872 Mangieri, M., Giaccone, G., Croci, D., Tagliavini, F., 2008. A new function of  
873 microtubule-associated protein tau: Involvement in chromosome stability. *Cell*  
874 *Cycle* 7, 1788–1794. <https://doi.org/10.4161/cc.7.12.6012>
- 875 Rothwell, E.S., Workman, K.P., Wang, D., Lacreuse, A., 2022. Sex differences in  
876 cognitive aging: a 4-year longitudinal study in marmosets. *Neurobiol. Aging* 109,  
877 88–99. <https://doi.org/10.1016/j.neurobiolaging.2021.09.015>
- 878 Rozovsky, I., Finch, C.E., Morgan, T.E., 1998. Age-related activation of microglia and  
879 astrocytes: In vitro studies show persistent phenotypes of aging, increased  
880 proliferation, and resistance to down-regulation. *Neurobiol. Aging* 19, 97–103.  
881 [https://doi.org/10.1016/S0197-4580\(97\)00169-3](https://doi.org/10.1016/S0197-4580(97)00169-3)
- 882 Sadoun, A., Rosito, M., Fonta, C., Girard, P., 2019. Key periods of cognitive decline in  
883 a nonhuman primate model of cognitive aging, the common marmoset (*Callithrix*  
884 *jacchus*). *Neurobiol. Aging* 74, 1–14.  
885 <https://doi.org/10.1016/j.neurobiolaging.2018.10.003>

- 886 Sadoun, A., Strelnikov, K., Bonté, E., Fonta, C., Girard, P., 2015. Cognitive impairment  
887 in a young marmoset reveals lateral ventriculomegaly and a mild hippocampal  
888 atrophy: a case report. *Sci. Rep.* 5, 1–11. <https://doi.org/10.1038/srep16046>
- 889 Sattler, R., Rothstein, J.D., 2006. Regulation and dysregulation of glutamate  
890 transporters. *Handb. Exp. Pharmacol.* 175, 277–303. [https://doi.org/10.1007/3-540-](https://doi.org/10.1007/3-540-29784-7_14)  
891 [29784-7\\_14](https://doi.org/10.1007/3-540-29784-7_14)
- 892 Schultz, C., Dehghani, F., Hubbard, G.B., Thal, D.R., Struckhoff, G., Braak, E., Braak,  
893 H., 2000a. Filamentous tau pathology in nerve cells, astrocytes, and  
894 oligodendrocytes of aged baboons. *J. Neuropathol. Exp. Neurol.* 59, 39–52.  
895 <https://doi.org/10.1093/jnen/59.1.39>
- 896 Schultz, C., Hubbard, G.B., Rüb, U., Braak, E., Braak, H., 2000b. Age-related  
897 progression of tau pathology in brains of baboons. *Neurobiol. Aging* 21, 905–912.  
898 [https://doi.org/10.1016/S0197-4580\(00\)00176-7](https://doi.org/10.1016/S0197-4580(00)00176-7)
- 899 Seifert, G., Schilling, K., Steinhäuser, C., 2006. Astrocyte dysfunction in neurological  
900 disorders: A molecular perspective. *Nat. Rev. Neurosci.* 7, 194–206.  
901 <https://doi.org/10.1038/nrn1870>
- 902 Sharma, G., Huo, A., Kimura, T., Shiozawa, S., Kobayashi, R., Sahara, N., Ishibashi,  
903 M., Ishigaki, S., Saito, T., Ando, K., Murayama, S., Hasegawa, M., Sobue, G.,  
904 Okano, H., Hisanaga, S. ichi, 2019. Tau isoform expression and phosphorylation in  
905 marmoset brains. *J. Biol. Chem.* 294, 11433–11444.  
906 <https://doi.org/10.1074/jbc.RA119.008415>
- 907 Simard, M., Nedergaard, M., 2004. The neurobiology of glia in the context of water and  
908 ion homeostasis. *Neuroscience* 129, 877–896.  
909 <https://doi.org/10.1016/j.neuroscience.2004.09.053>
- 910 Sjöberg, M.K., Shestakova, E., Mansuroglu, Z., Maccioni, R.B., Bonnefoy, E., 2006.

- 911        Tau protein binds to pericentromeric DNA: a putative role for nuclear tau in  
912        nucleolar organization. *J. Cell Sci.* 119, 2025–34. <https://doi.org/10.1242/jcs.02907>
- 913        Sofroniew, M. V., 2009. Molecular dissection of reactive astrogliosis and glial scar  
914        formation. *Trends Neurosci.* 32, 638–647.  
915        <https://doi.org/10.1016/j.tins.2009.08.002>
- 916        Sofroniew, M. V., Vinters, H. V., 2010. Astrocytes: Biology and pathology. *Acta*  
917        *Neuropathol.* 119, 7–35. <https://doi.org/10.1007/s00401-009-0619-8>
- 918        Stranahan, A.M., Mattson, M.P., 2010. Selective vulnerability of neurons in layer II of  
919        the entorhinal cortex during aging and Alzheimer’s disease. *Neural Plast.* 2010.  
920        <https://doi.org/10.1155/2010/108190>
- 921        Strohschein, S., Hüttmann, K., Gabriel, S., Binder, D.K., Heinemann, U., Steinhäuser,  
922        C., 2011. Impact of aquaporin-4 channels on K<sup>+</sup> buffering and gap junction  
923        coupling in the hippocampus. *Glia* 59, 973–980. <https://doi.org/10.1002/glia.21169>
- 924        Sultan, A., Nessler, F., Violet, M., Bégard, S., Loyens, A., Talahari, S., Mansuroglu,  
925        Z., Marzin, D., Sergeant, N., Humez, S., Colin, M., Bonnefoy, E., Buée, L., Galas,  
926        M.C., 2011. Nuclear Tau, a key player in neuronal DNA protection. *J. Biol. Chem.*  
927        286, 4566–4575. <https://doi.org/10.1074/jbc.M110.199976>
- 928        T’Hart, B.A., Abbott, D.H., Nakamura, K., Fuchs, E., 2012. The marmoset monkey: A  
929        multi-purpose preclinical and translational model of human biology and disease.  
930        *Drug Discov. Today* 17, 1160–1165. <https://doi.org/10.1016/j.drudis.2012.06.009>
- 931        Tang, Y., Le, W., 2016. Differential roles of M1 and M2 microglia in neurodegenerative  
932        diseases. *Mol. Neurobiol.* 53, 1181–1194. [https://doi.org/10.1007/s12035-014-](https://doi.org/10.1007/s12035-014-9070-5)  
933        9070-5
- 934        Verkhatsky, A., Marutle, A., Rodríguez-Arellano, J.J., Nordberg, A., 2015. Glial  
935        asthenia and functional paralysis: A new perspective on neurodegeneration and

- 936 Alzheimer's disease. *Neuroscientist* 21, 552–568.  
937 <https://doi.org/10.1177/1073858414547132>
- 938 Walker, P., Weaver, V., Lach, B., LeBlanc, J., Skorska, M., 1994. Endonuclease  
939 activities associated with high molecular weight and internucleosomal DNA  
940 fragmentation in apoptosis. *Exp. Cell Res.* 213, 100–106.
- 941 Wei, Y., Qu, M.H., Wang, X.S., Chen, L., Wang, D.L., Liu, Y., Hua, Q., He, R.Q.,  
942 2008. Binding to the minor groove of the double-strand, Tau protein prevents DNA  
943 damage by peroxidation. *PLoS One* 3.  
944 <https://doi.org/10.1371/journal.pone.0002600>
- 945 Woodruff-Pak, D.S., 2008. Animal models of Alzheimer's disease: Therapeutic  
946 implications. *J. Alzheimer's Dis.* 15, 507–521. [https://doi.org/10.3233/jad-2008-](https://doi.org/10.3233/jad-2008-15401)  
947 15401
- 948 Workman, K.P., Healey, B., Carlotto, A., Lacreuse, A., 2018. One-year change in  
949 cognitive flexibility and fine motor function in middle-aged male and female  
950 marmosets (*Callithrix jacchus*). *Am. J. Primatol.* e22924.  
951 <https://doi.org/10.1002/ajp.22924>
- 952 Wu, Y., Zhang, A.Q., Yew, D.T., 2005. Age related changes of various markers of  
953 astrocytes in senescence-accelerated mice hippocampus. *Neurochem. Int.* 46, 565–  
954 574. <https://doi.org/10.1016/j.neuint.2005.01.002>
- 955 Xiao, Q., Yan, P., Ma, X., Liu, H., Perez, R., Zhu, A., Gonzales, E., Burchett, J.M.,  
956 Schuler, D.R., Cirrito, J.R., Diwan, A., Lee, J.M., 2014. Enhancing astrocytic  
957 lysosome biogenesis facilitates A $\beta$  clearance and attenuates amyloid plaque  
958 pathogenesis. *J. Neurosci.* 34, 9607–9620.  
959 <https://doi.org/10.1523/JNEUROSCI.3788-13.2014>
- 960 Xu, X., Lai, Y., Hua, Z.C., 2019. Apoptosis and apoptotic body: Disease message and

961 therapeutic target potentials. *Biosci. Rep.* 39, 1–17.  
962 <https://doi.org/10.1042/BSR20180992>

963 Yeh, C.Y., Vadhwana, B., Verkhatsky, A., Rodríguez, J.J., 2011. Early astrocytic  
964 atrophy in the entorhinal cortex of a triple transgenic animal model of Alzheimer’s  
965 disease. *ASN Neuro* 3, 271–279. <https://doi.org/10.1042/AN20110025>

966 Yoshida, T., Goldsmith, S.K., Morgan, T.E., Stone, D.J., Finch, C.E., 1996.  
967 Transcription supports age-related increases of GFAP gene expression in the male  
968 rat brain. *Neurosci. Lett.* 215, 107–110. [https://doi.org/10.1016/0304-](https://doi.org/10.1016/0304-3940(96)12966-9)  
969 [3940\(96\)12966-9](https://doi.org/10.1016/0304-3940(96)12966-9)

970 Zamanian, J.L., Xu, L., Foo, L.C., Nouri, N., Zhou, L., Giffard, R.G., Barres, B.A.,  
971 2012. Genomic analysis of reactive astrogliosis. *J. Neurosci.* 32, 6391–6410.  
972 <https://doi.org/10.1523/JNEUROSCI.6221-11.2012>

973  
974  
975  
976  
977  
978  
979  
980  
981  
982  
983



984

## FIGURE LEGENDS

985

986

987 **Figure 1. GFAP+ astrocytes the brain of marmosets of different ages in entorhinal cortex**  
988 **and hippocampus (DG, CA1, CA2-CA3).** A. Representative photomicrographs of GFAP+  
989 astrocytes in adolescence, adult, old and aged marmosets in selected brain regions. Scale bars 40  
990  $\mu\text{m}$ . **B. Quantification of GFAP+ astrocytes per brain region.** The number of GFAP+  
991 astrocytes did not change with age in CA3, CA2-CA1 regions. In DG, there was a significant  
992 decreased in the number of GFAP+ in adults compared to adolescents. In ENT, aged marmoset  
993 had a decreased number of GFAP+ astrocytes than old subjects. Data represent means  $\pm$  S.E.M.  
994 One-way ANOVA, Tukey post hoc analysis. \* $p < 0.05$ .

995

996

997

998 **Figure 2. Morphological changes in astrocytes during the aging process in**  
999 **marmosets.** **A)** Representative photomicrographs of GFAP+ astrocytic of adolescent,  
1000 adult, old and aged marmosets in the brain regions analyzed. Note that in dentate gyrus  
1001 and ENT, astrocytes of adult and old marmosets showed longer astrocytic processes than  
1002 astrocytes of adolescent and aged subjects. In CA3, astrocytes of adolescent, adult and  
1003 old marmosets showed longer astrocytic processes than astrocytes of aged subjects. In  
1004 CA2-CA3, astrocytes of old marmosets showed longer astrocytic processes than  
1005 astrocytes of all other age groups. Scale bars 10  $\mu\text{m}$ . **B)** Sholl analysis of GFAP+  
1006 astrocytes. Astrocytic process length (APL) and total astrocytic process length (total APL)  
1007 in the hippocampus and ENT of marmosets at different ages. DG showed a significantly  
1008 increased APL in adults (radius 3-15, except 8) and old (radius 5, 7 and 8) marmosets  
1009 with respect to adolescent. In aged marmosets, APL decreased with respect to any other  
1010 age group (adolescents, radius 7-10; adults, radius 2-15; old, radius 4-12). Total APL was  
1011 increased in adult marmoset compared to adolescents. In aged marmosets, total APL  
1012 showed a significant reduction with respect to adult and old marmosets. CA3 region  
1013 showed a significantly decreased APL in aged marmoset compared to any other age  
1014 groups (adolescents: radius 3-14; adults, radius 3-12; old, radius 3-13). Aged marmosets  
1015 showed a significant decreased of total APL than the rest of the groups (all  $p < 0.001$ ).  
1016 CA2-CA1. APL increased in old marmosets compared to adolescents (radius 5-14), adults  
1017 (radius 6-14) and aged (radius 3-15) marmosets. In aged marmosets, APL decreased  
1018 compared to any other age groups (adolescents, radius 2-11; adults, radius 3-13; old,  
1019 radius 3-15). Old subjects present a greater total APL compared to adolescents, adults and  
1020 aged marmosets. ENT. APL significantly increased in adults (radius 5-9) and old (radius  
1021 6-11) marmosets with respect to adolescents. In aged subjects, APL decreased compared  
1022 to any other age groups (adolescents, radius 1-12; adults, radius 1-13; old, radius 3-12).  
1023 Aged subjects showed a major decreased in total APL compared to adults and old  
1024 marmosets. Data represent means  $\pm$  S.E.M. For radial analysis of APL, a multiple t-test  
1025 followed by Holm-Sidak post hoc analysis was performed with \*\* $p < 0.01$ , \*\*\* $p < 0.001$ ;  
1026 \*\*\*\* $p < 0.0001$ . For quantifications of total APL, one-way ANOVA followed by Tukey  
1027 post hoc analysis was performed. a (\*\* $p < 0.01$ ), b (\*\* $p < 0.001$ ) and c (\*\*\*\* $p < 0.0001$ )

1028

1029

1030

1031 **Figure 3. Volume and branching points of astrocytic processes in different brain**  
1032 **regions of marmoset during aging.** Representative images of the Sholl analysis by  
1033 concentric spheres of an hypertrophic astrocyte (A) and an atrophic astrocyte (B).  
1034 Processes' ends are represented as pink circles and branch points as yellow circles. Scale  
1035 bars 10  $\mu\text{m}$ . C) Quantification of astrocytic process volume (APV). The volume of  
1036 astrocytic processes of adult and old marmosets increased compared to adolescent  
1037 subjects in DG, CA2-CA1 and ENT. However, in aged marmosets, APV was significantly  
1038 reduced in all regions compared to adult and old marmosets. In CA3, astrocytes of aged  
1039 marmosets showed a significantly decreased APV compared to adolescents, adults and  
1040 old subjects. D) Quantification of astrocytic branching points (ABP). In the four regions  
1041 analyzed the number of ABP showed a tendency to increase with age. However, it was  
1042 only significant in CA2-CA1 where old marmoset had an increased ABP compared to  
1043 adult and adolescent animals. In aged marmosets, ABP decreased in all regions compared  
1044 to the other age groups. Data represent means  $\pm$  S.E.M. One-way ANOVA, Tukey post  
1045 hoc analysis. \* $p < 0.05$ ; \*\* $p < 0.01$ ; \*\*\* $p < 0.001$ ; \*\*\*\* $p < 0.0001$ .

1046

1047

1048 **Figure 4. RNA oxidation in astrocytes of marmosets.** A) Representative  
1049 photomicrographs of astrocytes (GFAP, green) double labeled with 8OH (red, RNA  
1050 oxidation marker 8OHG in brain sections of adolescent, adults, old and aged marmosets  
1051 in CA3. Scale bar 20  $\mu\text{m}$ . Last two panels show a higher magnification of astrocytes in  
1052 adult and aged marmosets. In the aged subject, two 8OHG+ astrocytes are flanking an  
1053 8OHG+ cell, but one astrocyte also show 8OHG-labeling in the cytoplasm (white arrow).  
1054 DAPI was used as a nuclear counterstain. Scale bar 10  $\mu\text{m}$ . B) Number of astrocytes  
1055 double labelled with 8OHG+ (RNA oxidation) in different brain regions. The number of  
1056 8OHG+ astrocytes are significantly increased in old and aged marmosets compared to  
1057 adolescents and adults, in all regions analyzed. C) Percentage of astrocytes labeled with  
1058 8OHG. Old and aged marmosets show a higher percentage of 8OHG+ astrocytes  
1059 compared to adolescent and adult subjects. CA2-CA1 was the region with the highest  
1060 increase of 8OHG+ astrocytes in old and aged marmosets, followed by CA3 and ENT.  
1061 DG was the region with the lowest percentage of 8OHG+ astrocytes. Data represent  
1062 means  $\pm$  S.E.M. One-way ANOVA, Tukey post hoc analysis. \* $p < 0.05$ ; \*\* $p < 0.01$ ; \*\*\* $p$   
1063  $< 0.001$ ; \*\*\*\* $p < 0.0001$ .

1064

1065

1066

1067

1068

1069 **Figure 5. pTau in astrocytes of the marmoset.** A) Representative photomicrographs of  
1070 astrocytes (GFAP, in green) double labelled with AT100 (phosphorylation in the residues  
1071 Thr212 and Ser214, in red) in CA3 of adolescent, adult, old and aged marmosets. In  
1072 adolescents, few astrocytes were AT100+. In adult, old, and aged marmosets most  
1073 astrocytes were AT100+. Note the intensity of AT100 labeling in the nucleus of astrocytes  
1074 of aged subjects. DAPI was used as a nuclear counterstain. Scale bar 40  $\mu\text{m}$ . B)  
1075 Quantification of AT100+ astrocytes in different brain regions of the marmoset. DG, CA3  
1076 and CA2-CA1 regions did not differ in the amount of AT100+ astrocytes. ENT show  
1077 a decreased number of AT100+ astrocytes in old and aged marmosets, compared to adults.  
1078 C) Percentage of AT100+ astrocytes (number of AT100+ astrocytes / total number of  
1079 astrocytes). There was an increase in the percentage of AT100+ astrocytes in CA3 region  
1080 of adult, old and aged subjects compared to adolescents. In CA2-CA1 old and aged  
1081 marmosets also showed a significant increase compared to adolescents. In ENT, the  
1082 percentage of AT100+ astrocytes was higher in adults compared to old subjects. Data  
1083 represent means  $\pm$  S.E.M. One-way ANOVA, Tukey post hoc analysis. \* $p < 0.05$ ; \*\* $p <$   
1084  $0.01$ ; \*\*\* $p < 0.001$ .

1085

1086

1087 **Figure 6. S100A10+ astrocytes had longer processes.** A) Representative  
1088 photomicrographs of astrocytes (GFAP+, green) with S100A10+ (red) in DG, CA3, CA2-  
1089 CA1, and ENT of old marmosets. Most S100A10+ astrocytes (white arrowheads) had  
1090 longer processes than S100A10- astrocytes (yellow arrows). DAPI was used as a nuclear  
1091 counterstain. Scale bar 10  $\mu\text{m}$ . B) Sholl analysis of S100A10+/- astrocytes. Astrocytic  
1092 processes length was significantly higher in S100A10+ astrocytes than S100A10-  
1093 astrocytes in DG (radius 2, 3, 4 and 6), CA3 (radius 4-7), CA2-CA1 (radius 3, 4 and 6),  
1094 and ENT (radius 3 and 4). Multiple t-test followed by Holm-Sidak post hoc analysis. \* $p$   
1095  $< 0.05$ . C) Quantification of the total APL of S100A10+ and S100A10-astrocytes. Total  
1096 APL in CA3, CA2-CA1 and ENT was significantly higher in S100A10+ astrocytes than  
1097 S100A10-. D) Quantification of APV. APV was significantly higher in S100A10+  
1098 astrocytes compared to S100A10- in DG, CA3 and ENT. E) Quantification of ABP.  
1099 S100A10+ astrocytes presented larger ABP compared to S100A10-, but the differences  
1100 were non-significant. Data represent means  $\pm$  S.E.M. One-way ANOVA followed by  
1101 Tukey post hoc analysis. \* $p < 0.05$ ; \*\* $p < 0.01$ .

1102

1103

1104 **Figure 7. DNA fragmentation in S100A10- astrocytes.** Representative  
1105 photomicrographs of astrocytes (GFAP+, green) with DNA fragmentation (TUNEL, red)  
1106 in the ENT of marmosets at different ages. In adolescents, most astrocytes do not present  
1107 TUNEL, except for astrocytes with few small processes (white arrowhead). In adults,  
1108 there were more TUNEL+ astrocytes (white arrowheads), however those astrocytes with  
1109 longer processes were negative for TUNEL (white arrow). In aged marmoset, most  
1110 astrocytes were TUNEL+ (white arrowheads). Note that TUNEL+ cells were higher in  
1111 aged marmosets compared to adolescents and adults. Negative controls for TUNEL  
1112 protocol are included. Lower two panels are representative images of the triple labeling:  
1113 GFAP+ (green), S100A10+ (cyan) and TUNEL+ (red) in CA3 of aged marmosets. A  
1114 magnification of S100A10+ astrocytes (white arrows) and two S100A10- astrocytes  
1115 (white arrowheads) that were TUNEL+. Scale bar 20  $\mu\text{m}$  for panels A-C and 10  $\mu\text{m}$  for  
1116 panels D and E. DAPI was used as a nuclear counterstain.

1117 **SUPPLEMENTARY INFORMATION**

1118

1119

1120

1121 **Supplementary Figure 1. GFAP fluorescence intensity (FI) of astrocytes in different**  
1122 **brain regions during aging. A)** Representative photomicrographs of GFAP<sup>+</sup> astrocytes  
1123 of adolescent, adult, old and aged marmosets. Scale bar 10  $\mu$ m. **B)** Quantification of  
1124 fluorescence intensity of GFAP<sup>+</sup> astrocytes located in the hippocampus (DG, CA3 and  
1125 CA2-CA1 regions) and the ENT. In DG and ENT, aged marmosets showed a decreased  
1126 FI compared to adolescent and old marmosets. In CA3 and CA2-CA1, old subjects  
1127 showed an increased FI than adolescent, adult and aged marmosets. Data represent means  
1128  $\pm$  S.E.M. One-way ANOVA, Tukey post hoc analysis. \* $p < 0.05$ ; \*\* $p < 0.01$ ; \*\*\* $p <$   
1129  $0.001$ ; \*\*\*\* $p < 0.0001$ .

1130

1131

1132

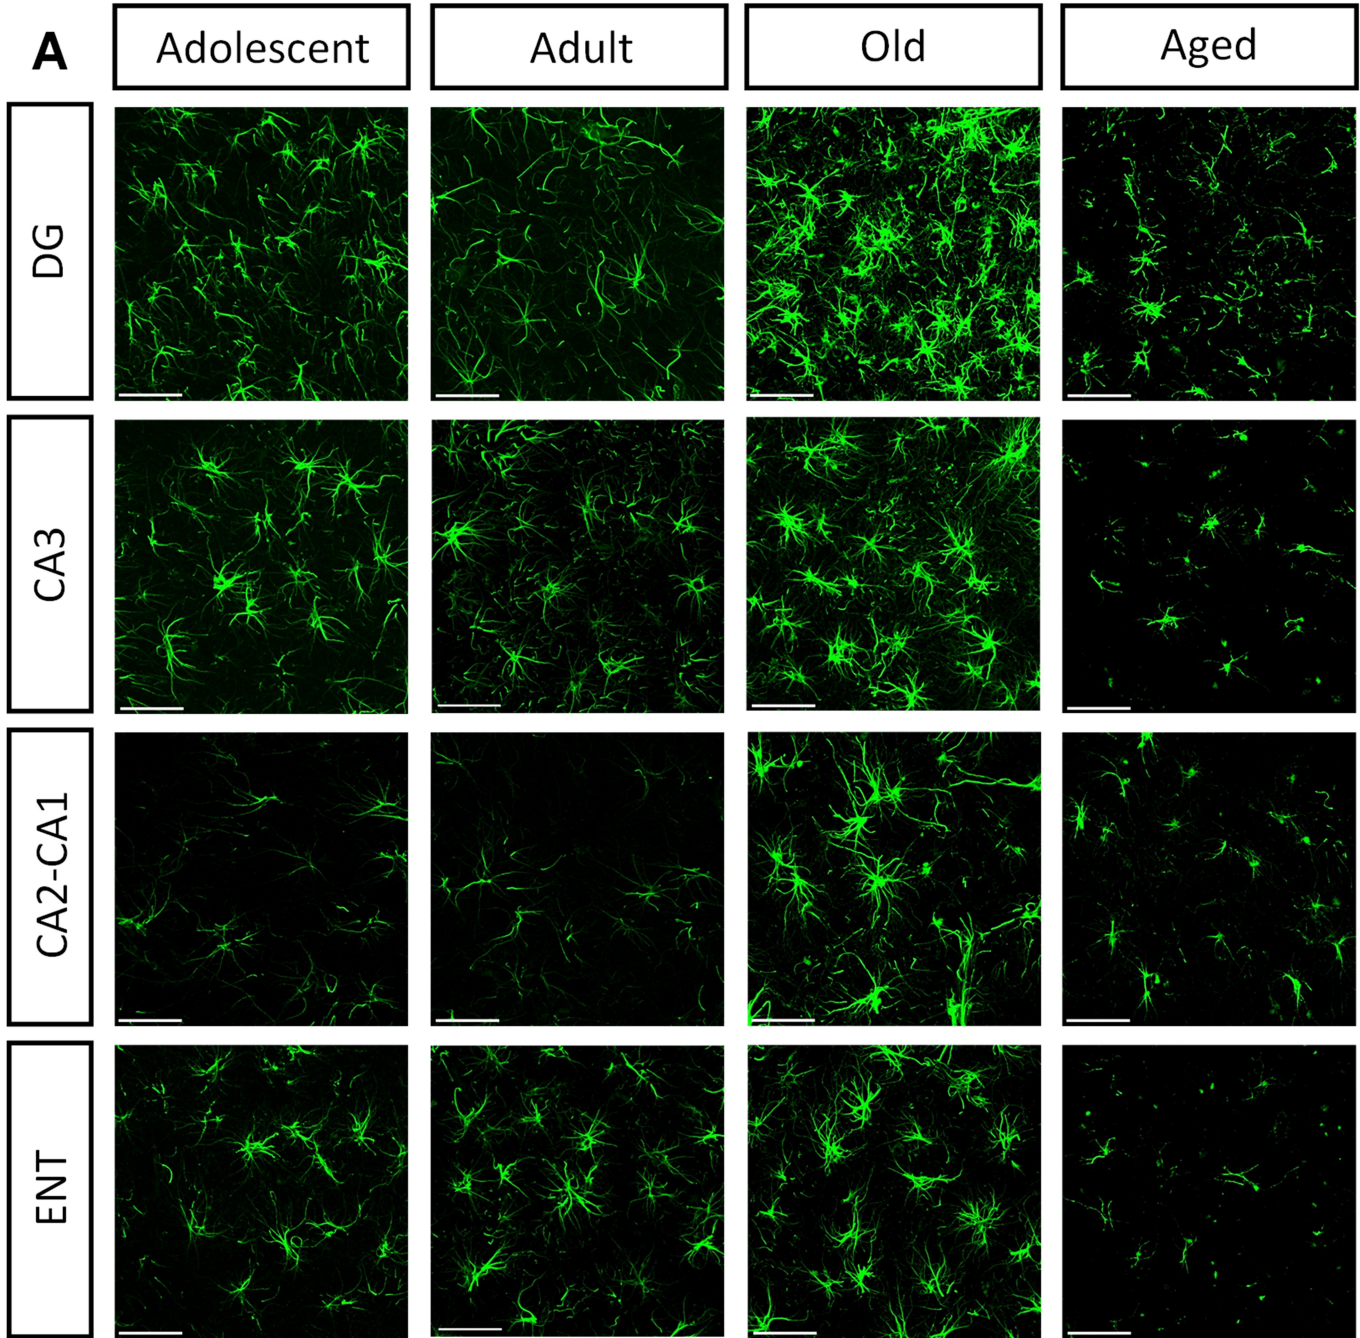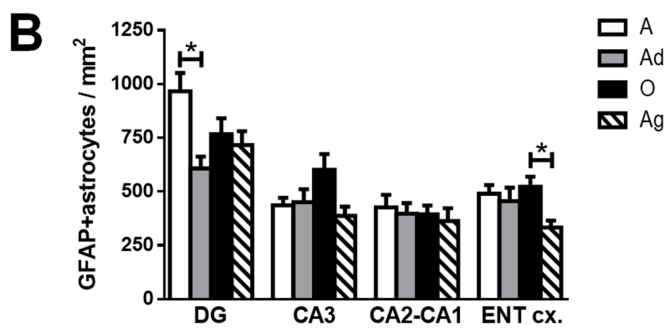

**A**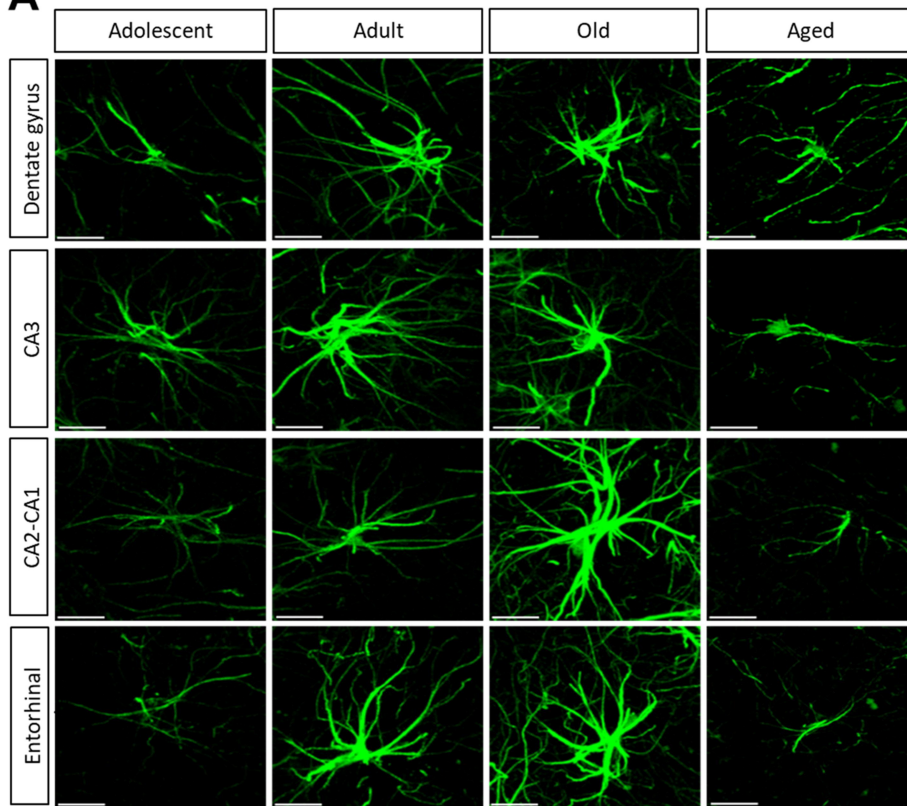**B**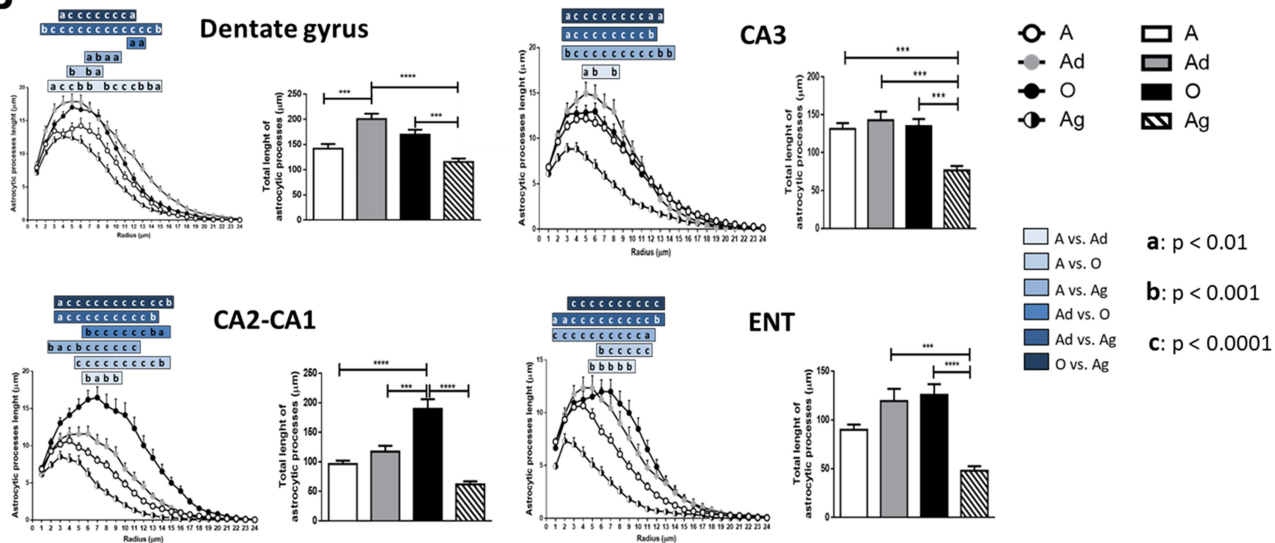

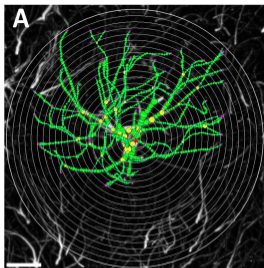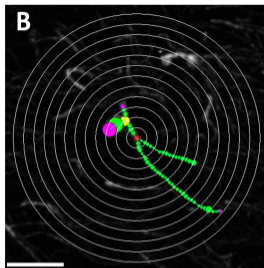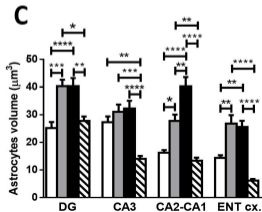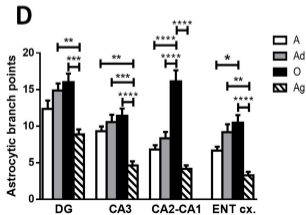

**A**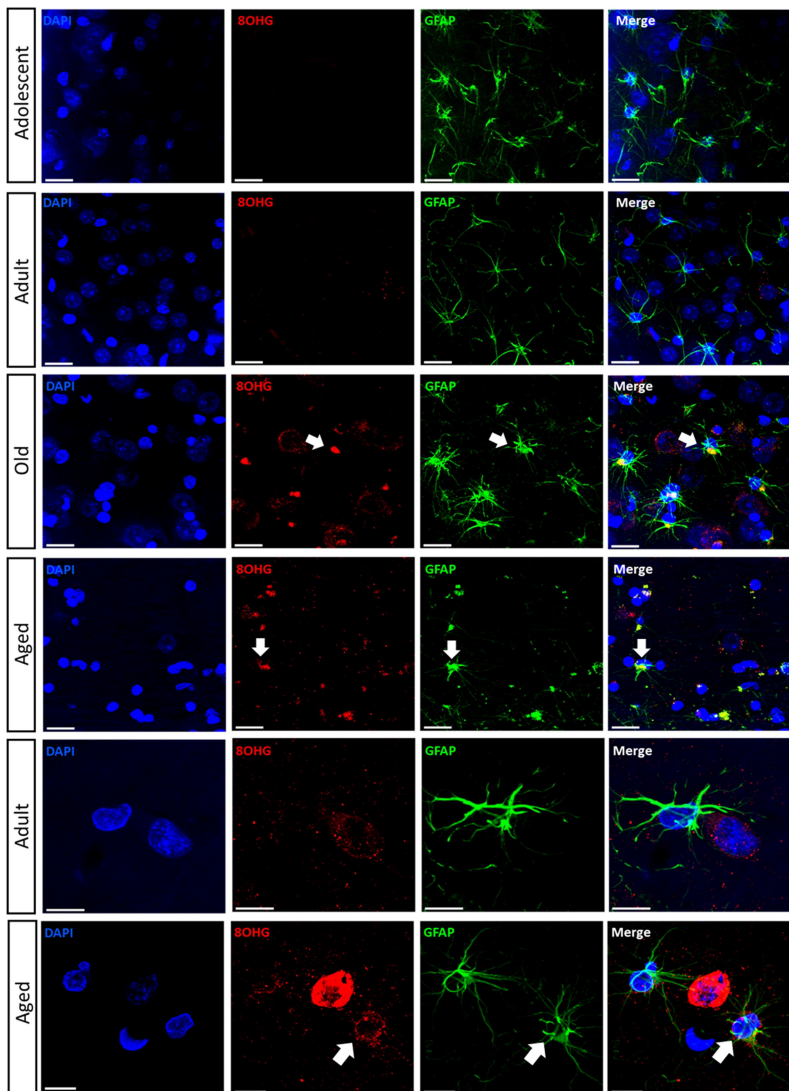**B**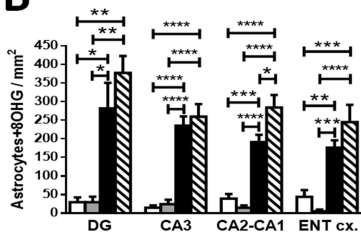**C**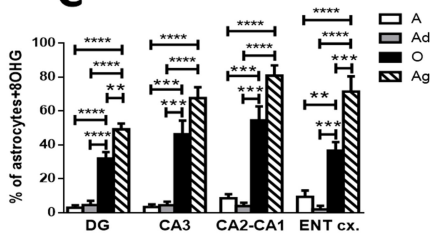



**A**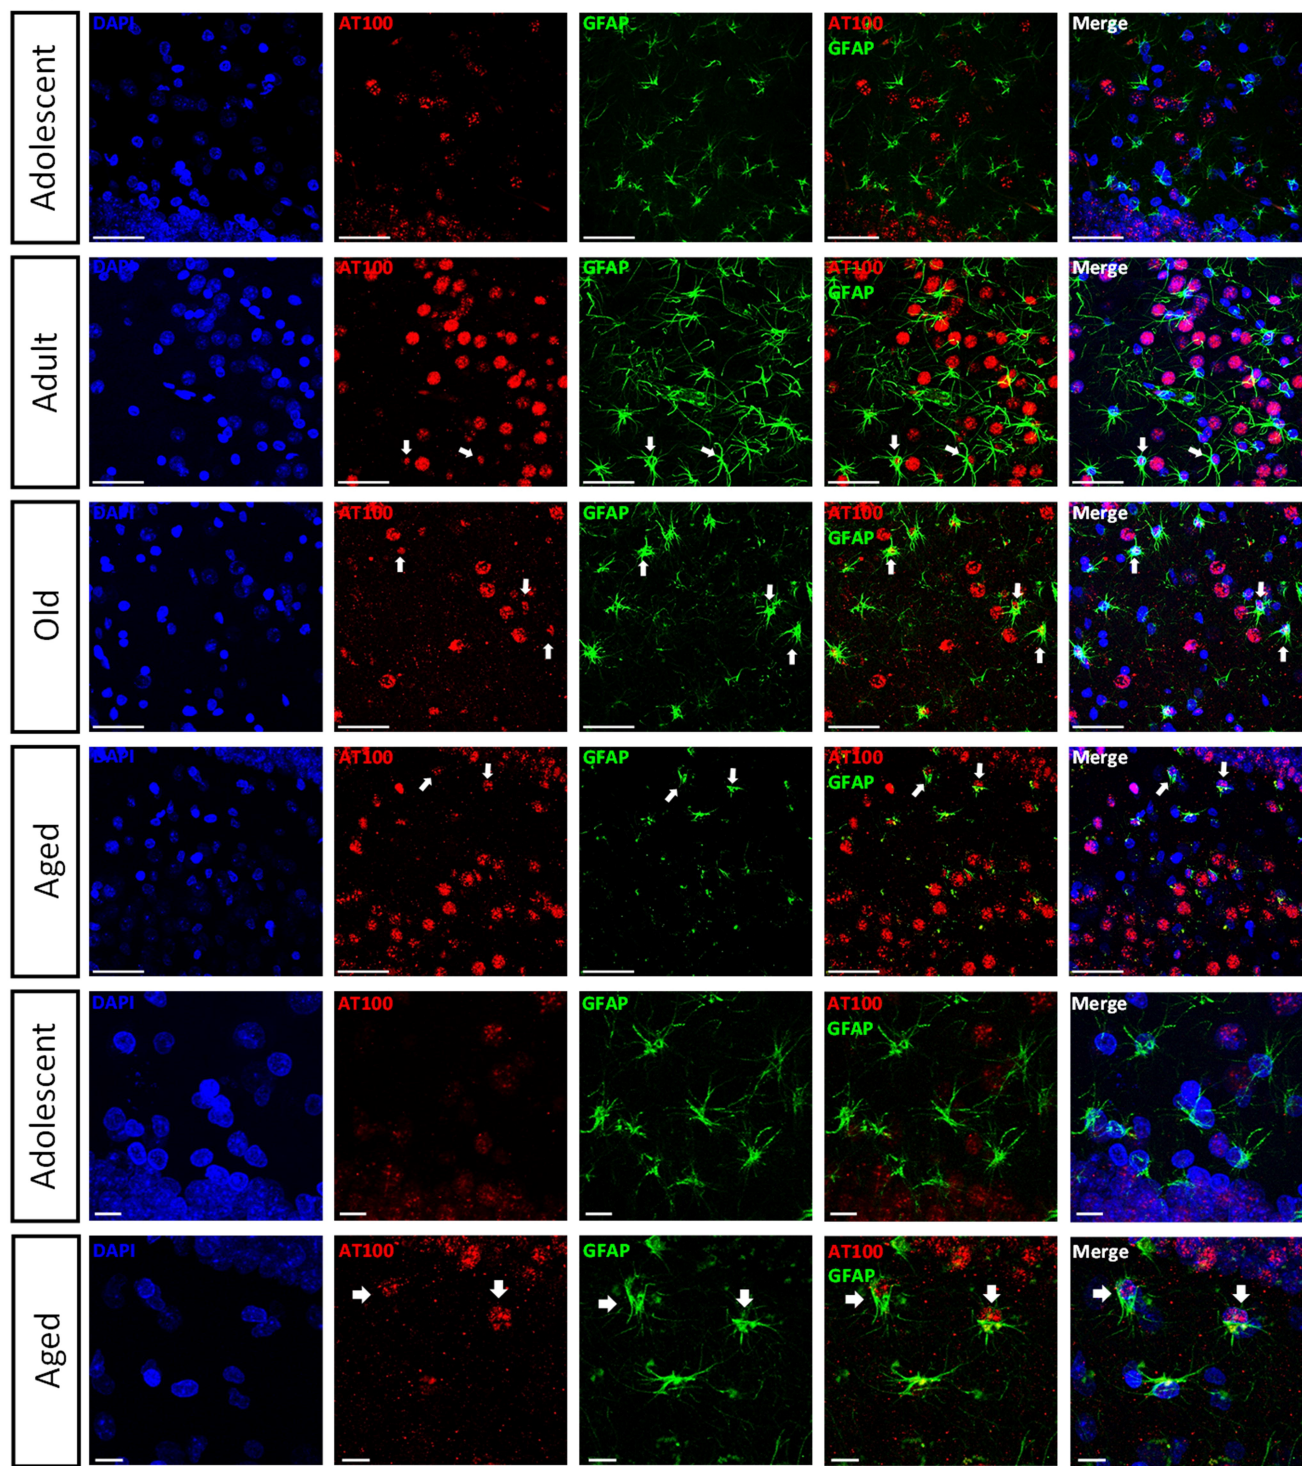**B**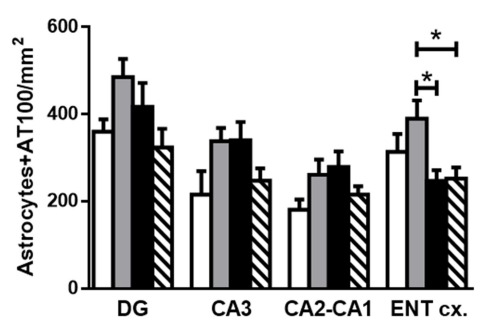**C**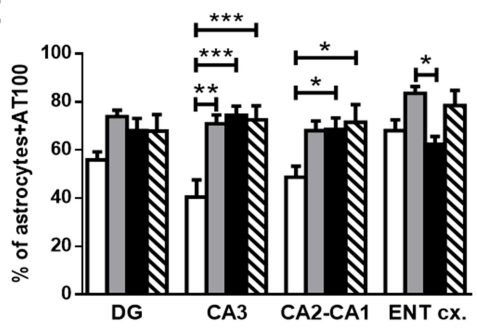

**A**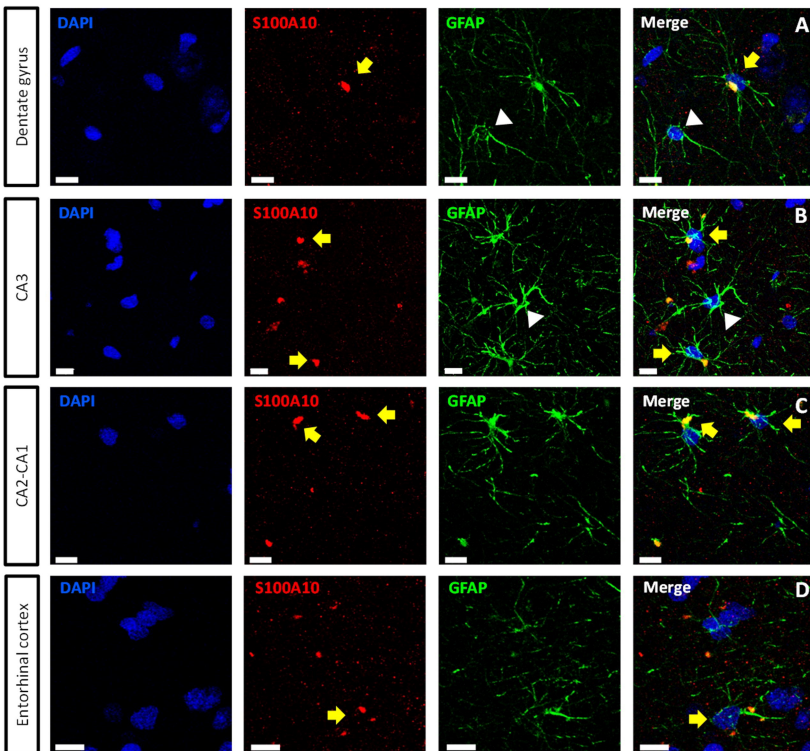**B**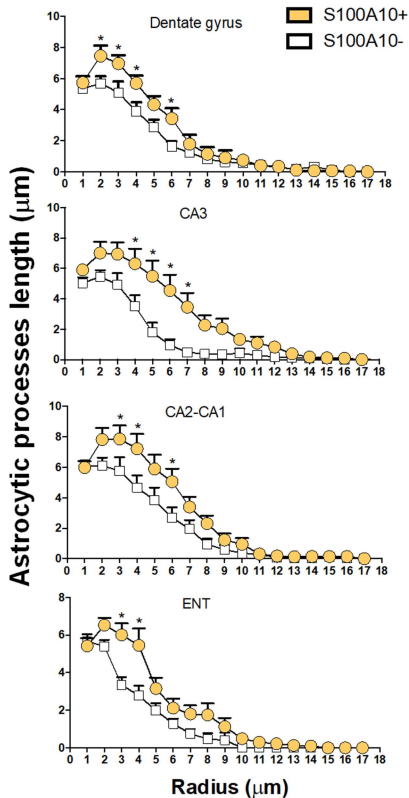**C**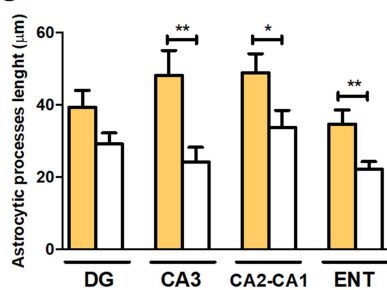**D**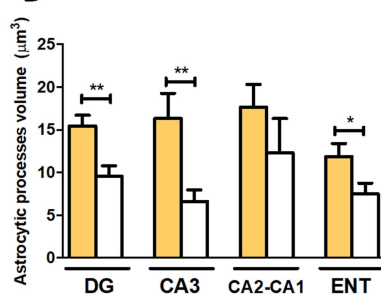**E**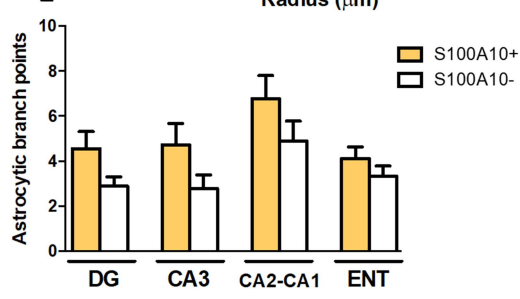

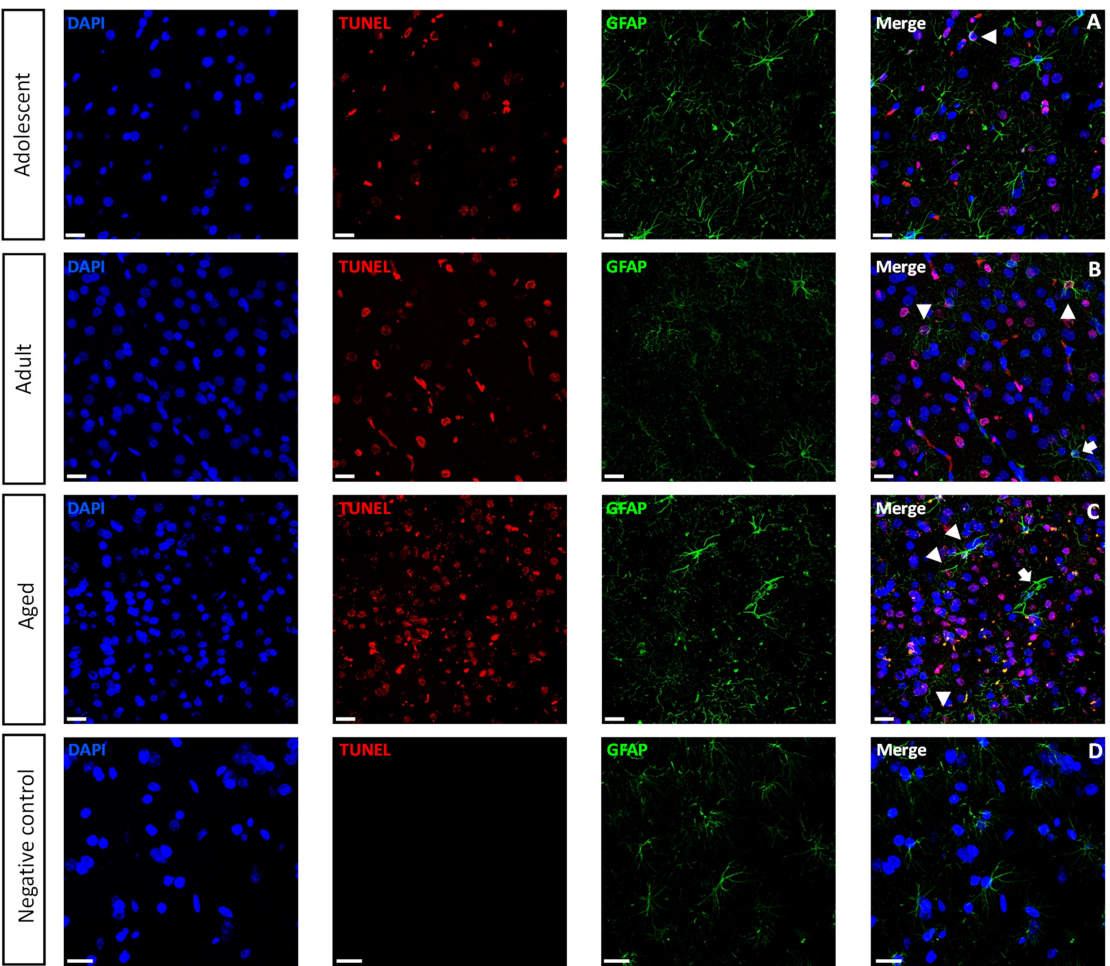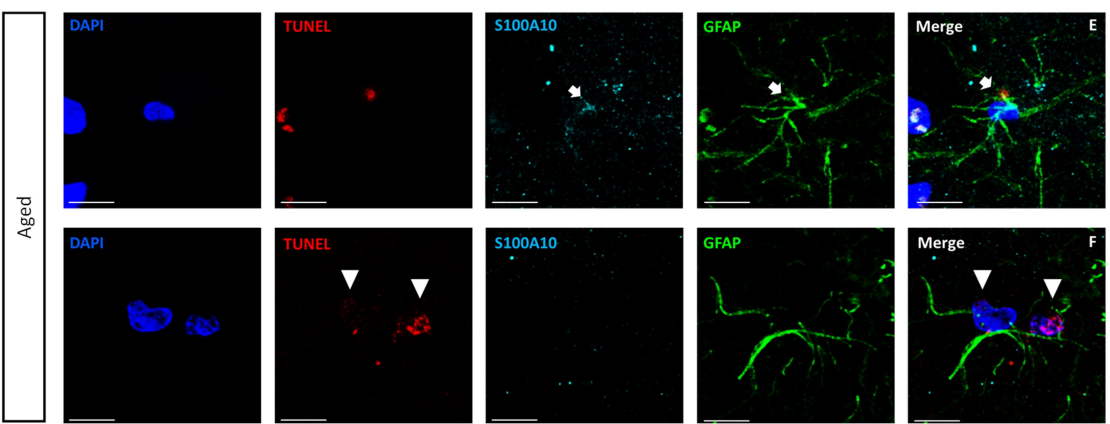

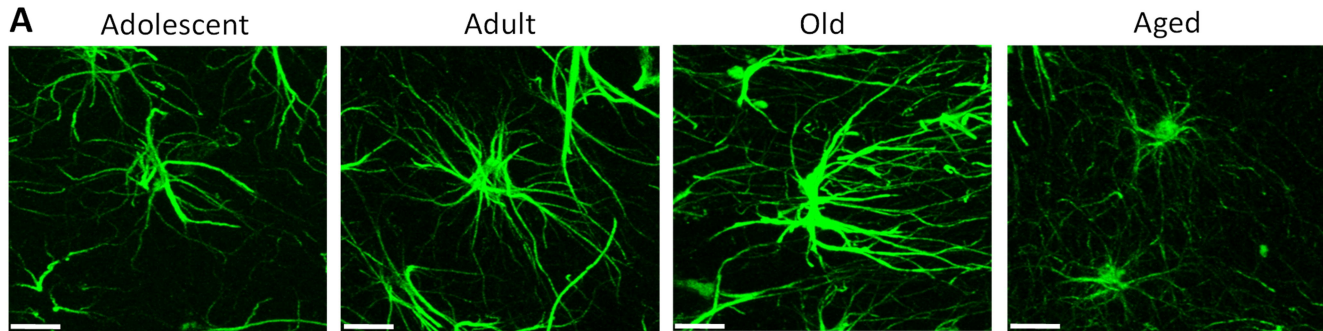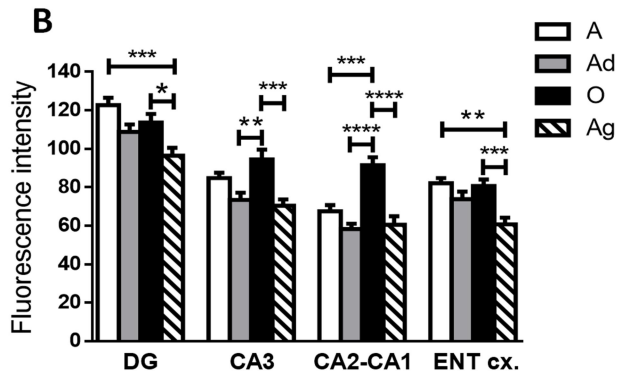

Source: https://www.biorxiv.org/content/biorxiv/early/2023/02/10/2023.02.09.527885.full.pdf?%3Fcollection=
